# Supplementary material for: Taurospongins B and C, new acetylenic fatty acid derivatives possessing a taurine amide residue from a marine sponge of the family Spongiidae
Source: Royal Society of Chemistry journal article supplement (doi:10.1039/c3ra47796g), 2014-01-01

## Supplementary Information

### Taurospongins B and C, new acetylenic fatty acid derivatives possessing a taurine amide residue from a marine sponge of the family Spongiidae

Takaaki Kubota,<sup>a</sup> Haruna Suzuki,<sup>a</sup> Azusa Takahashi-Nakaguchi,<sup>b</sup> Jane Fromont,<sup>c</sup> Tohru Gonoï<sup>b</sup> and Jun'ichi Kobayashi\*<sup>a</sup>

<sup>a</sup> Graduate School of Pharmaceutical Sciences, Hokkaido University, Sapporo 060-0812, Japan

<sup>b</sup> Mycology Research Center, Chiba University, Chiba 260-0856, Japan

<sup>c</sup> Western Australian Museum, Locked Bag 49, Welshpool DC, WA 6986, Australia

Table of Contents:

**Figure S1.** <sup>1</sup>H NMR spectrum of taurospongins B (**1**) in CD<sub>3</sub>OD (600 MHz).

**Figure S2.** <sup>13</sup>C NMR spectrum of taurospongins B (**1**) in CD<sub>3</sub>OD (150 MHz).

**Figure S3.** <sup>1</sup>H-<sup>1</sup>H COSY spectrum of taurospongins B (**1**) in CD<sub>3</sub>OD (600 MHz).

**Figure S4.** TOCSY spectrum of taurospongins B (**1**) in CD<sub>3</sub>OD (600 MHz).

**Figure S5.** HMQC spectrum of taurospongins B (**1**) in CD<sub>3</sub>OD (600 MHz).

**Figure S6.** HMBC spectrum of taurospongins B (**1**) in CD<sub>3</sub>OD (600 MHz).

**Figure S7.** <sup>1</sup>H NMR spectrum of taurospongins C (**2**) in CD<sub>3</sub>OD (600 MHz).

**Figure S8.** <sup>13</sup>C NMR Spectrum of taurospongins C (**2**) in CD<sub>3</sub>OD (150 MHz).

**Figure S9.** <sup>1</sup>H NMR spectrum of **4** in CDCl<sub>3</sub> (600 MHz).

**Figure S10.** <sup>1</sup>H NMR spectrum of **7** in CDCl<sub>3</sub> (500 MHz).

**Figure S11.** <sup>13</sup>C NMR spectrum of **7** in CDCl<sub>3</sub> (100 MHz).

**Figure S12.** <sup>1</sup>H NMR spectrum of **12** in CDCl<sub>3</sub> (400 MHz).

**Figure S13.** <sup>13</sup>C NMR spectrum of **12** in CDCl<sub>3</sub> (150 MHz).

**Figure S14.** <sup>1</sup>H NMR spectrum of **11a** in CDCl<sub>3</sub> (400 MHz).

**Figure S15.** <sup>13</sup>C NMR spectrum of **11a** in CDCl<sub>3</sub> (100 MHz).

**Figure S16.** <sup>1</sup>H NMR spectrum of **11b** in CDCl<sub>3</sub> (400 MHz).

**Figure S17.** <sup>13</sup>C NMR spectrum of **11b** in CDCl<sub>3</sub> (100 MHz).

**Figure S18.** <sup>1</sup>H NMR spectrum of **13a** in CDCl<sub>3</sub> (400 MHz).

**Figure S19.** <sup>13</sup>C NMR spectrum of **13a** in CDCl<sub>3</sub> (100 MHz).

**Figure S20.** <sup>1</sup>H NMR spectrum of **13b** in CDCl<sub>3</sub> (400 MHz).

**Figure S21.** <sup>13</sup>C NMR spectrum of **13b** in CDCl<sub>3</sub> (100 MHz).

**Figure S22.** <sup>1</sup>H NMR spectrum of **14a** in CDCl<sub>3</sub> (400 MHz).

**Figure S23.**  $^{13}\text{C}$  NMR spectrum of **14a** in  $\text{CDCl}_3$  (100 MHz).  
**Figure S24.**  $^1\text{H}$  NMR spectrum of **14b** in  $\text{CDCl}_3$  (400 MHz).  
**Figure S25.**  $^{13}\text{C}$  NMR spectrum of **14b** in  $\text{CDCl}_3$  (100 MHz).  
**Figure S26.**  $^1\text{H}$  NMR spectrum of **15a** in  $\text{CDCl}_3$  (400 MHz).  
**Figure S27.**  $^{13}\text{C}$  NMR spectrum of **15a** in  $\text{CDCl}_3$  (100 MHz).  
**Figure S28.**  $^1\text{H}$  NMR spectrum of **15b** in  $\text{CDCl}_3$  (400 MHz).  
**Figure S29.**  $^{13}\text{C}$  NMR spectrum of **15b** in  $\text{CDCl}_3$  (100 MHz).  
**Figure S30.**  $^1\text{H}$  NMR spectrum of **6a** in  $\text{CD}_3\text{OD}$  (600 MHz).  
**Figure S31.**  $^{13}\text{C}$  NMR spectrum of **6a** in  $\text{CD}_3\text{OD}$  (100 MHz).  
**Figure S32.**  $^1\text{H}$  NMR spectrum of **6b** in  $\text{CD}_3\text{OD}$  (600 MHz).  
**Figure S33.**  $^{13}\text{C}$  NMR spectrum of **6b** in  $\text{CD}_3\text{OD}$  (100 MHz).  
**Figure S34.**  $^1\text{H}$  NMR spectra of **4**, **6a**, and **6b** in  $\text{CD}_3\text{OD}$  (600 MHz).

**Figure S1.**  $^1\text{H}$  NMR spectrum of taurospongins B (**1**) in  $\text{CD}_3\text{OD}$  (600 MHz).

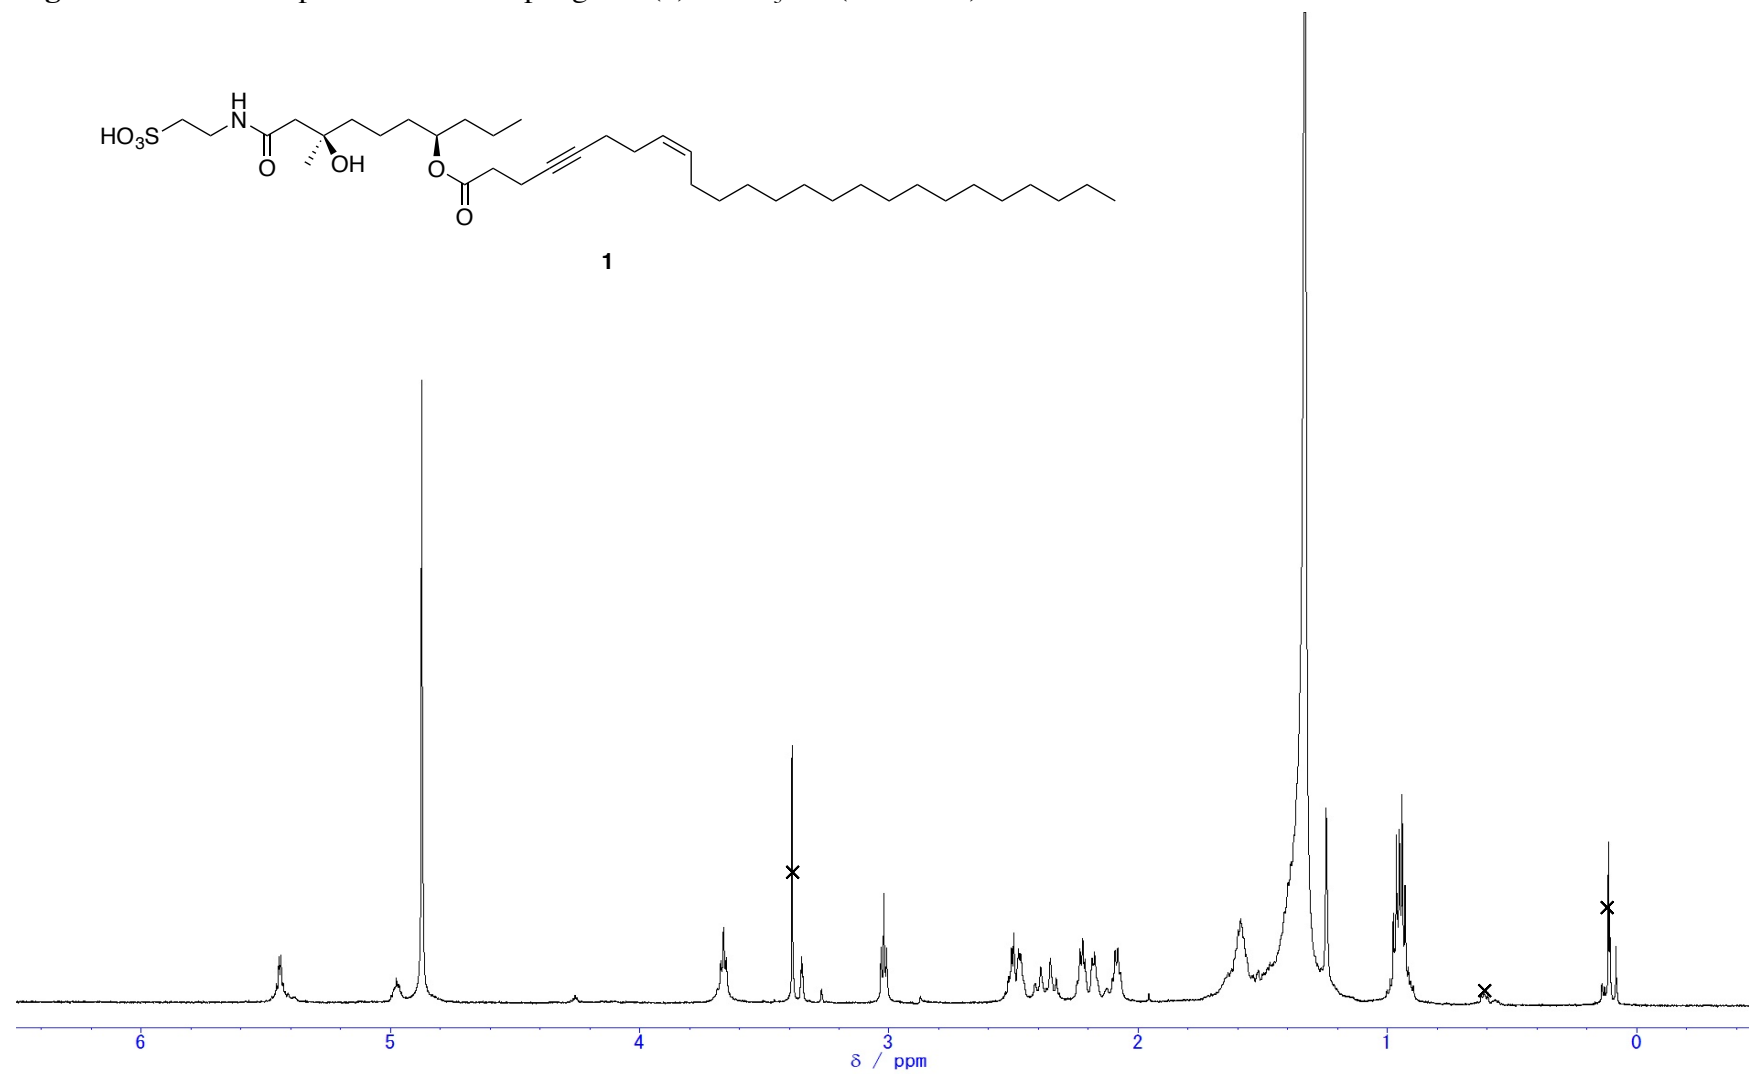

**Figure S2.**  $^{13}\text{C}$  NMR spectrum of taurospongins B (**1**) in  $\text{CD}_3\text{OD}$  (150 MHz).

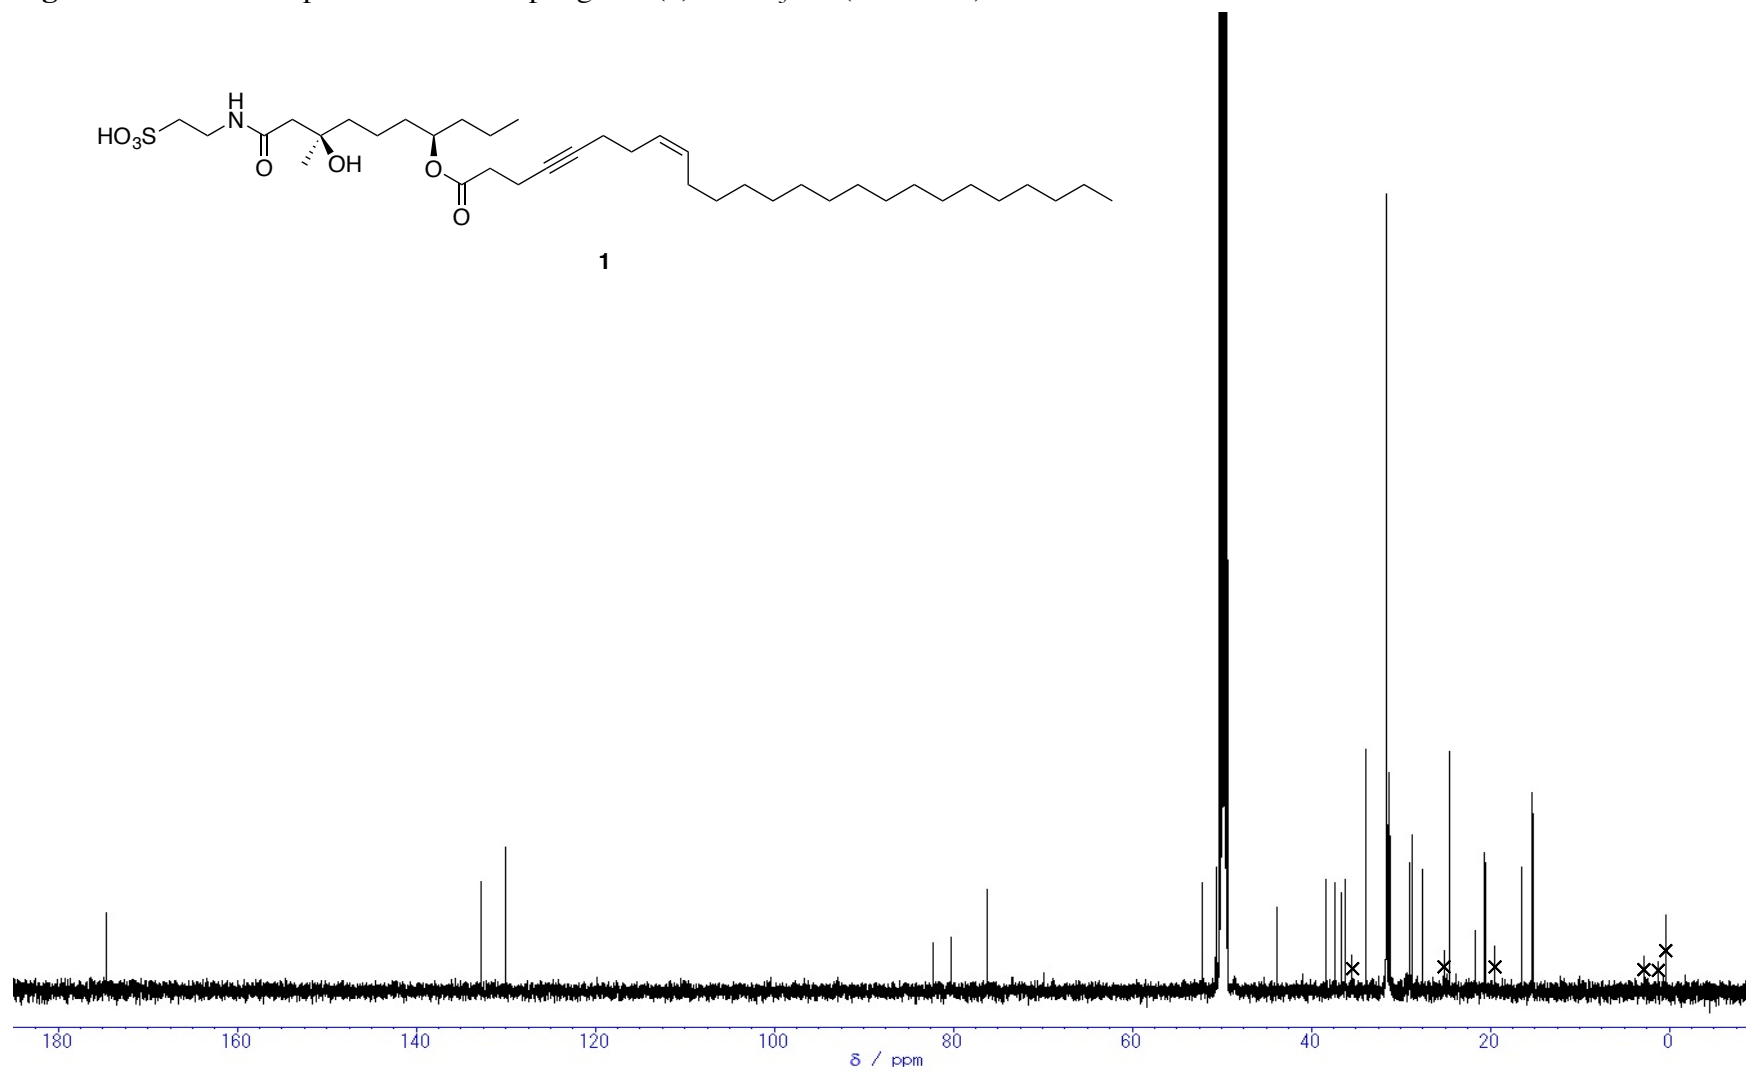

**Figure S3.**  $^1\text{H}$ - $^1\text{H}$  COSY spectrum of taurospongins B (**1**) in  $\text{CD}_3\text{OD}$  (600 MHz).

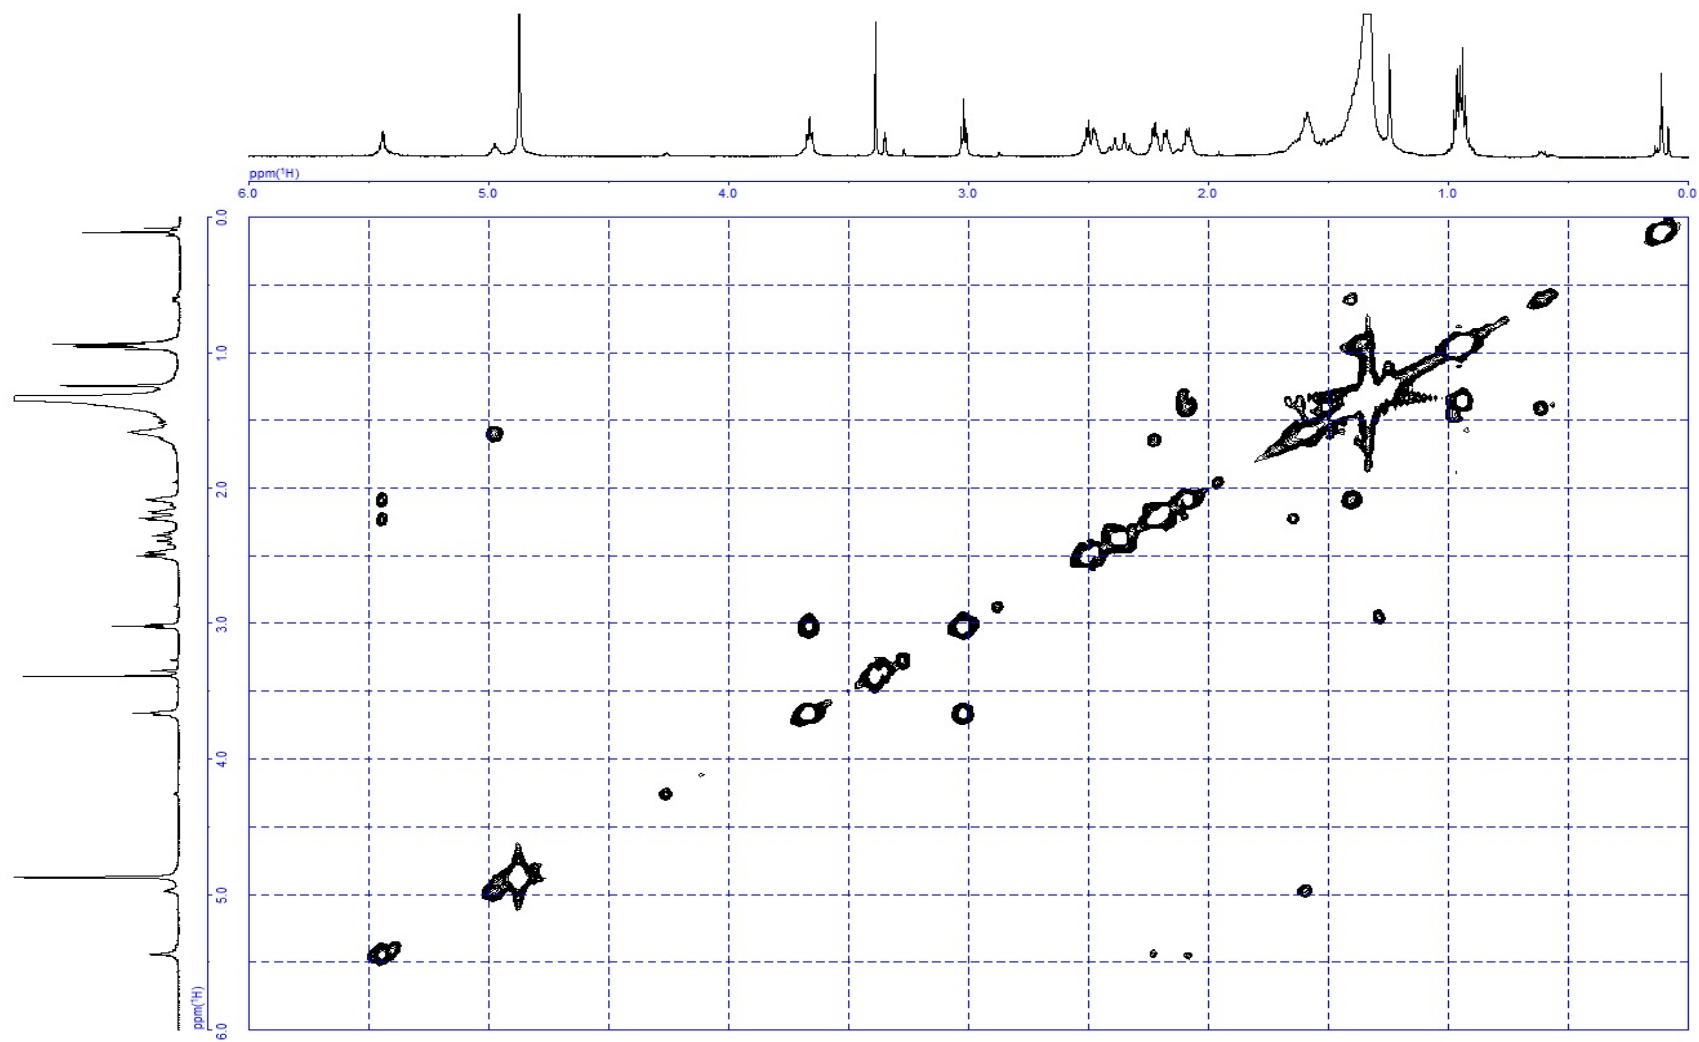

**Figure S4.** TOCSY spectrum of taurospongini B (**1**) in CD<sub>3</sub>OD (600 MHz).

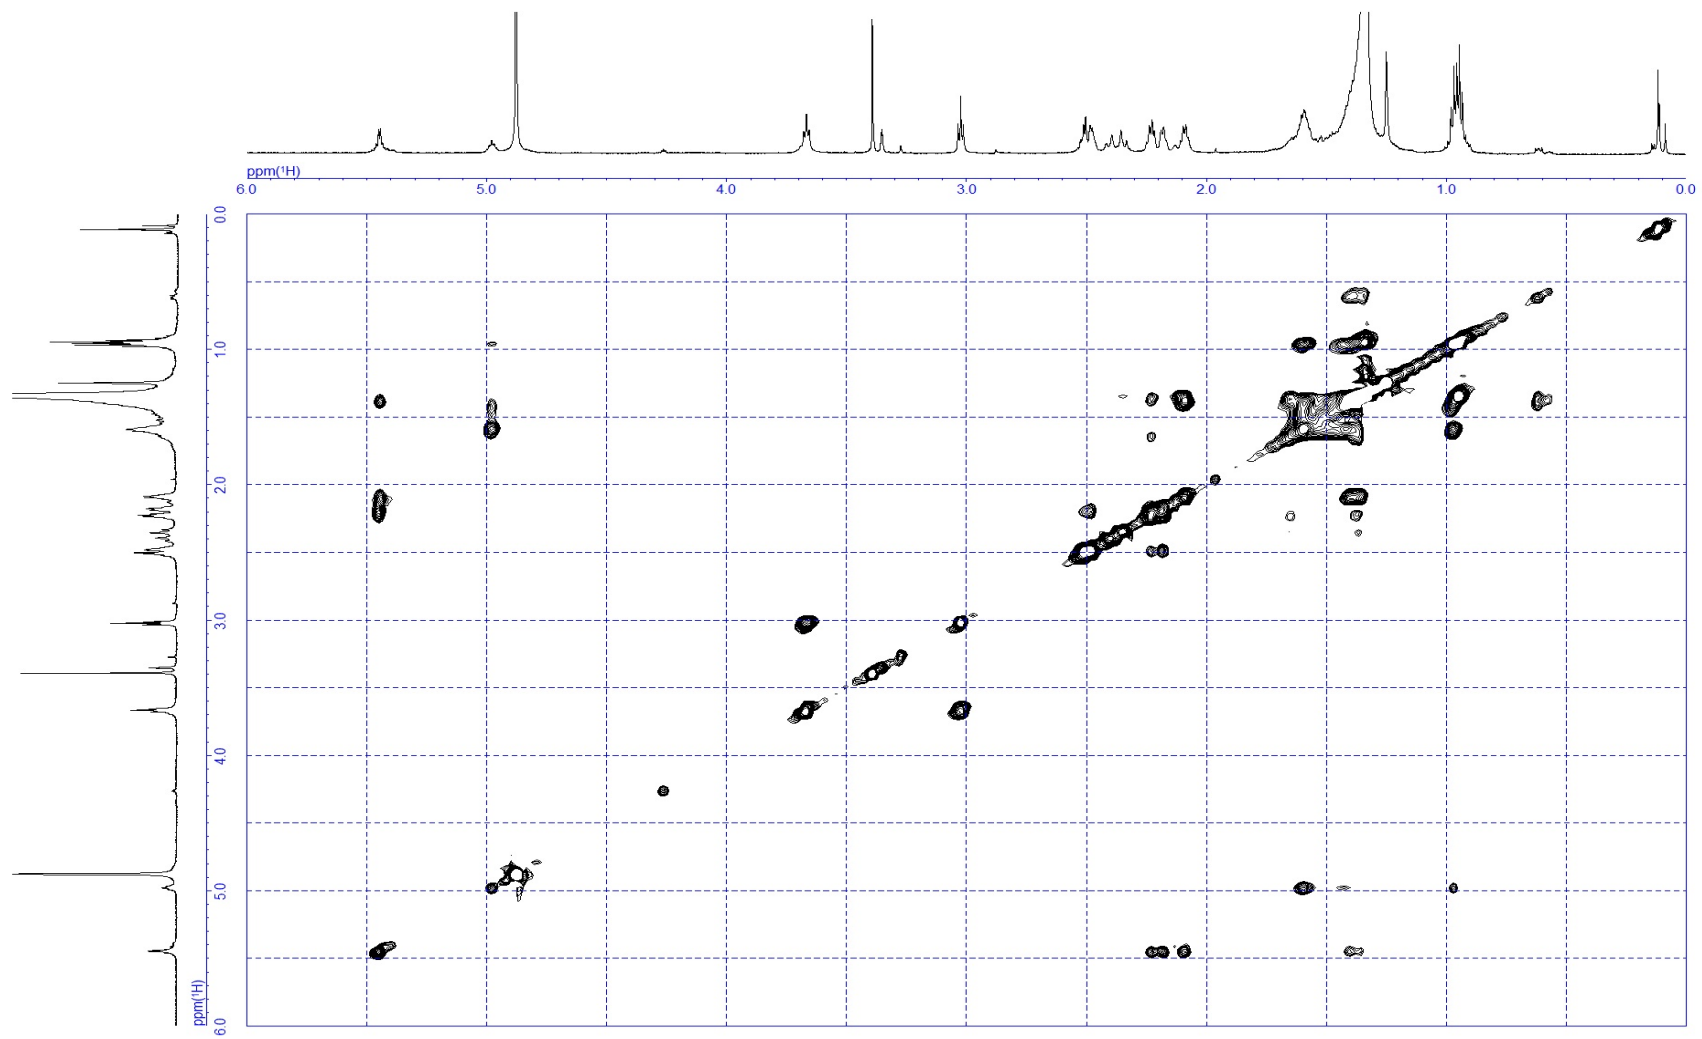

**Figure S5.** HMQC spectrum of taurospongini B (**1**) in CD<sub>3</sub>OD (600 MHz).

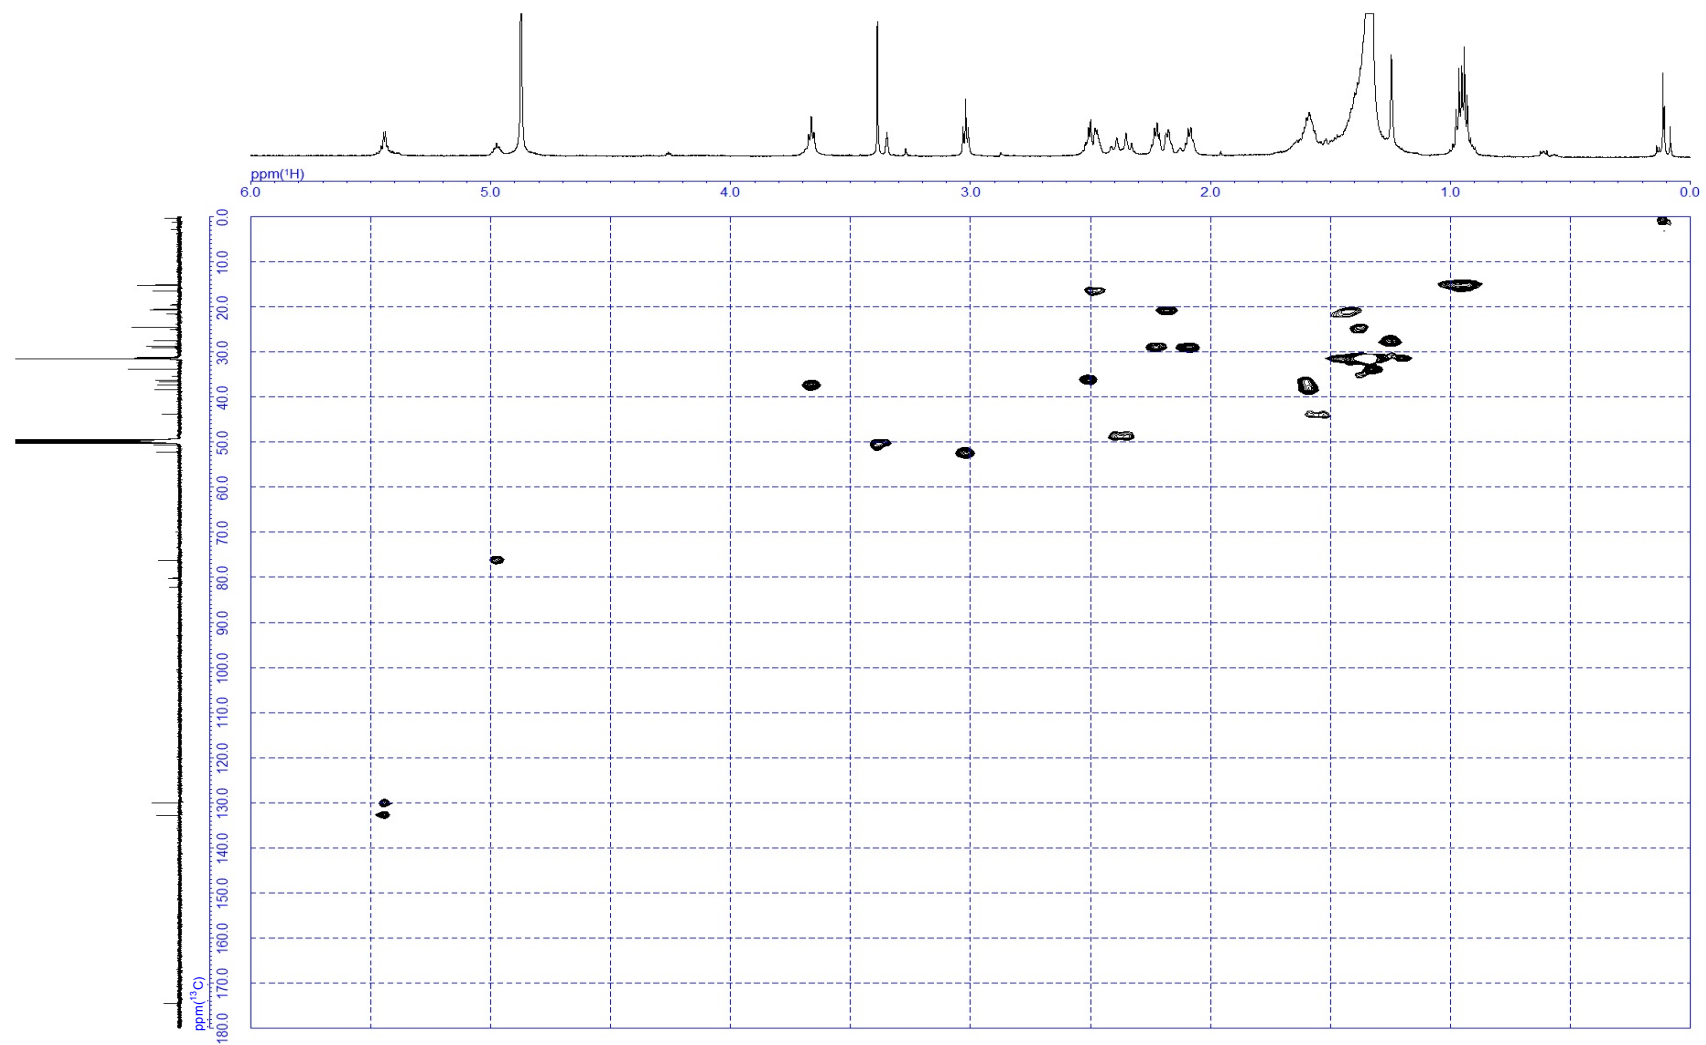

**Figure S6.** HMBC spectrum of taurospongini B (**1**) in CD<sub>3</sub>OD (600 MHz).

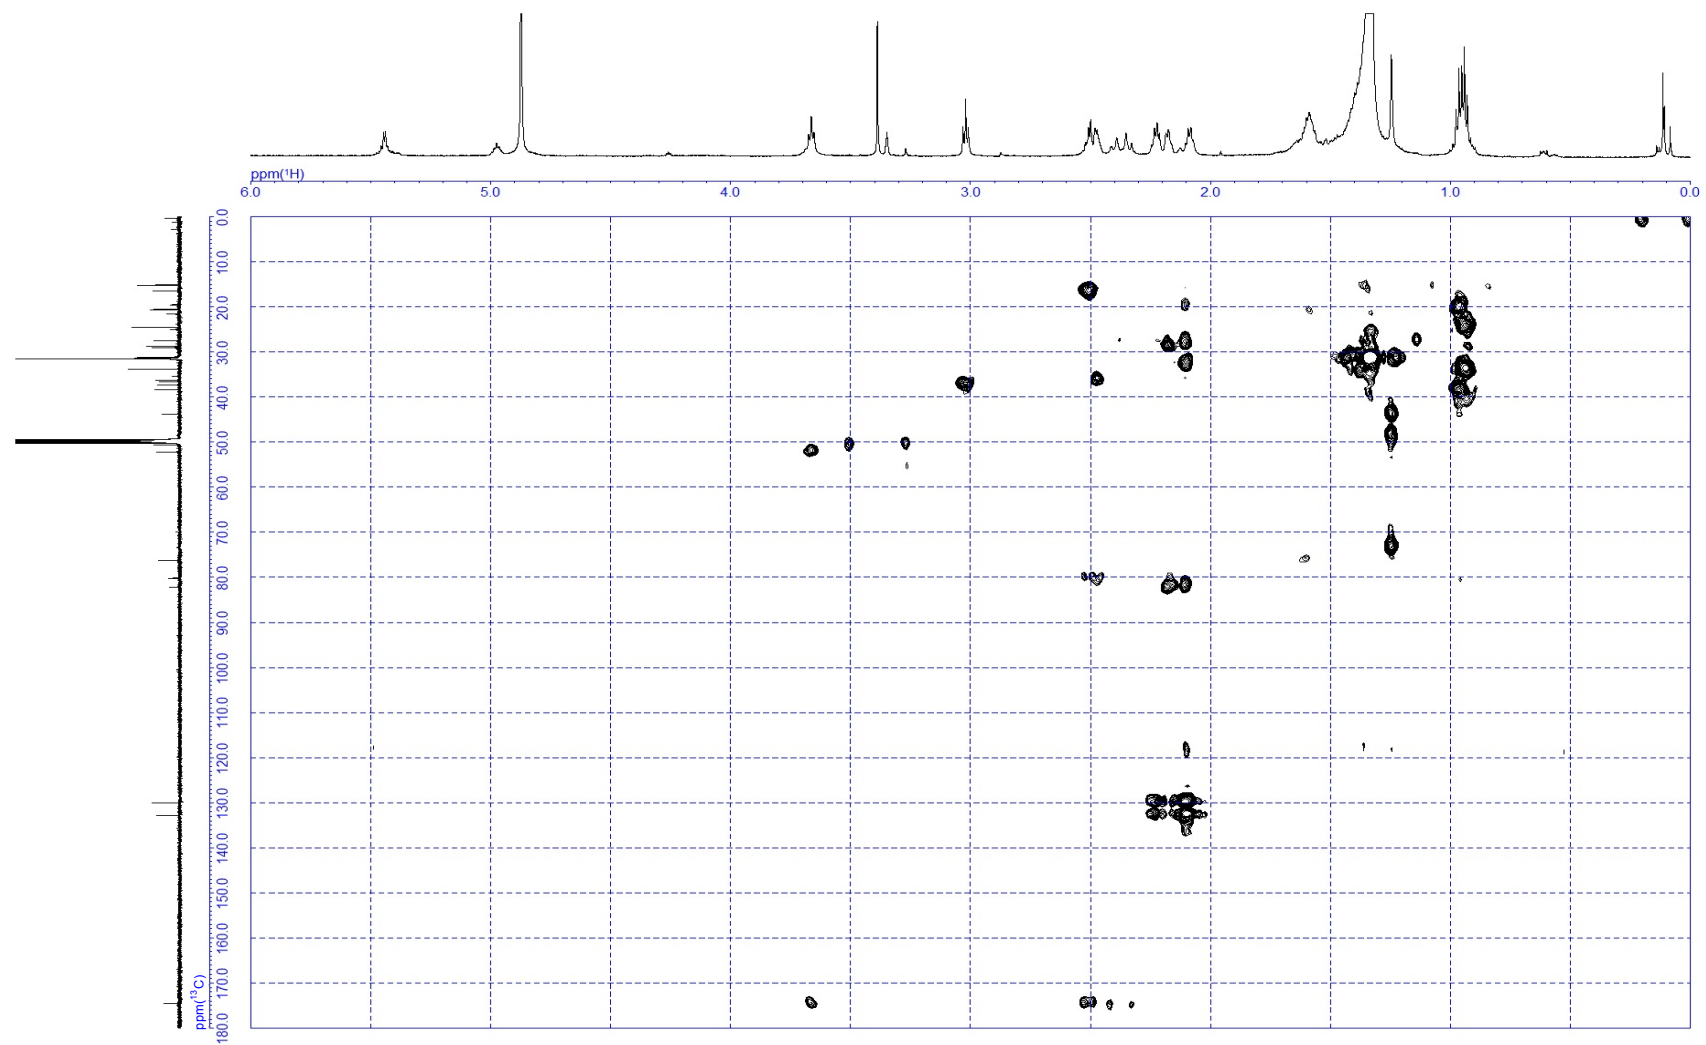



**Figure S7.**  $^1\text{H}$  NMR spectrum of taurospongins C (**2**) in  $\text{CD}_3\text{OD}$  (600 MHz).

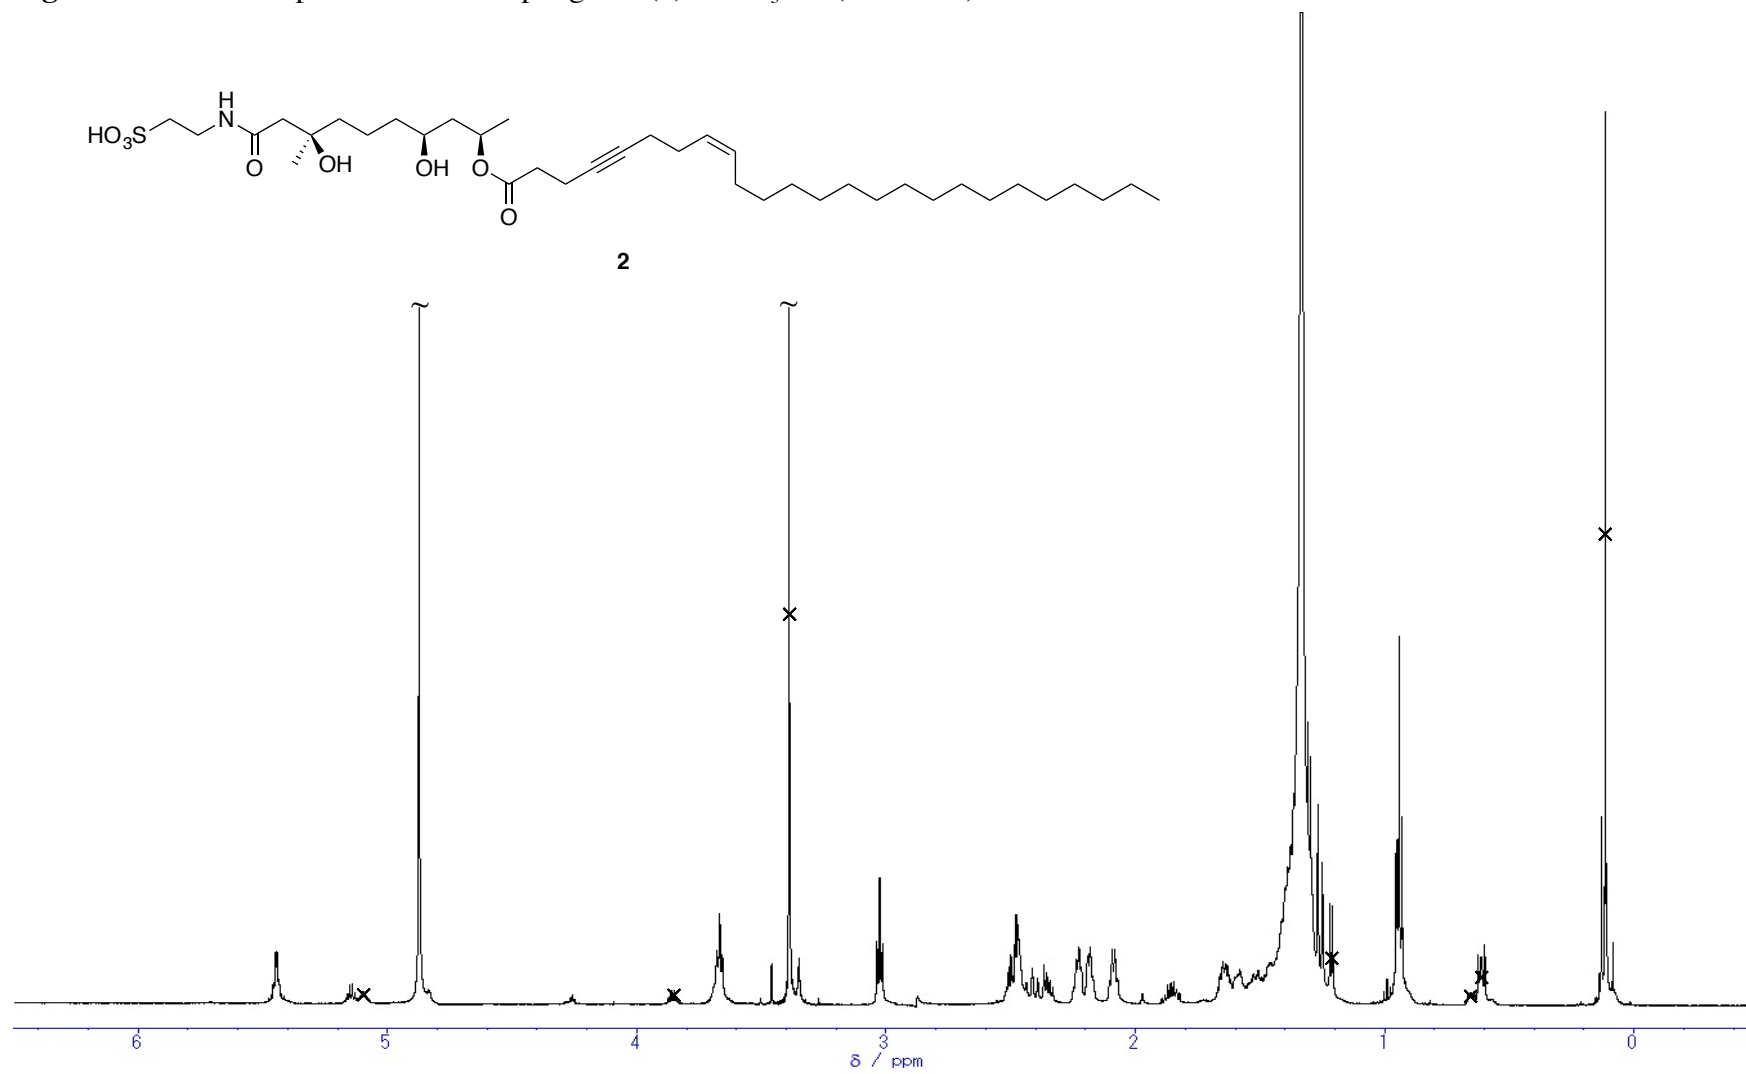

**Figure S8.**  $^{13}\text{C}$  NMR Spectrum of taurospongic acid (**2**) in  $\text{CD}_3\text{OD}$  (150 MHz).

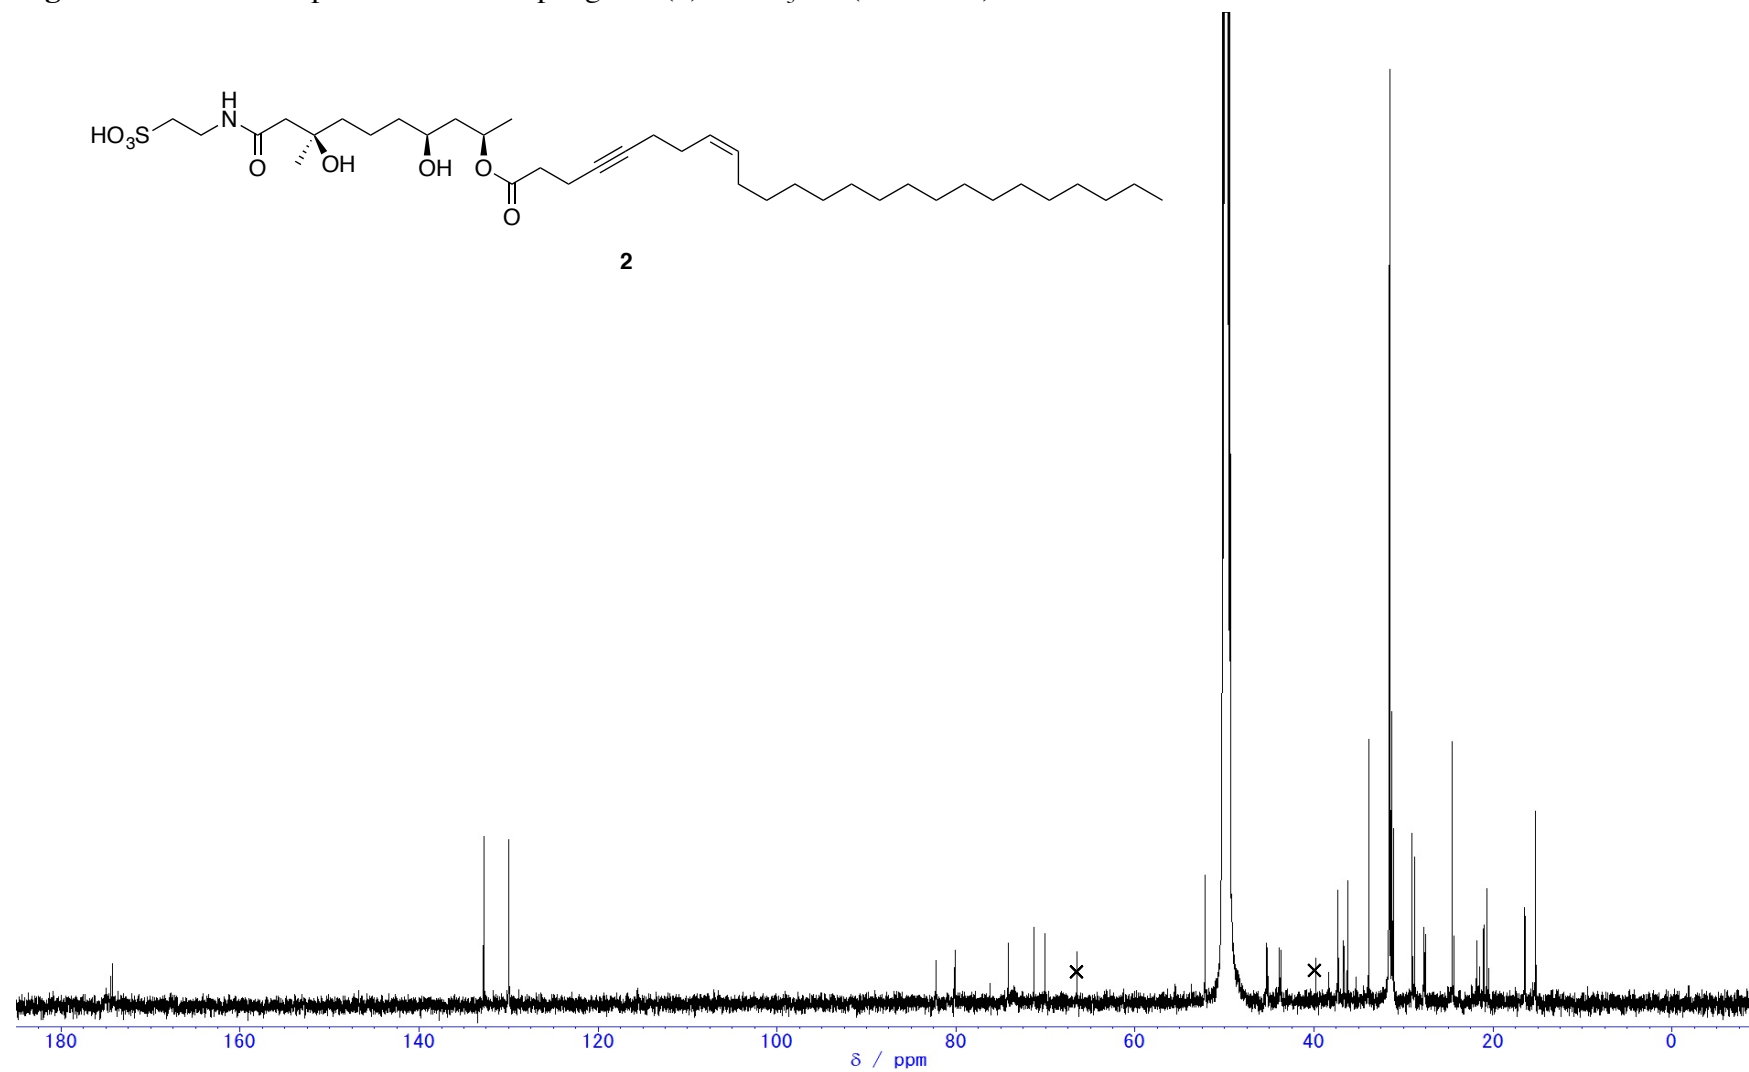

**Figure S9.**  $^1\text{H}$  NMR spectrum of **4** in  $\text{CD}_3\text{OD}$  (600 MHz).

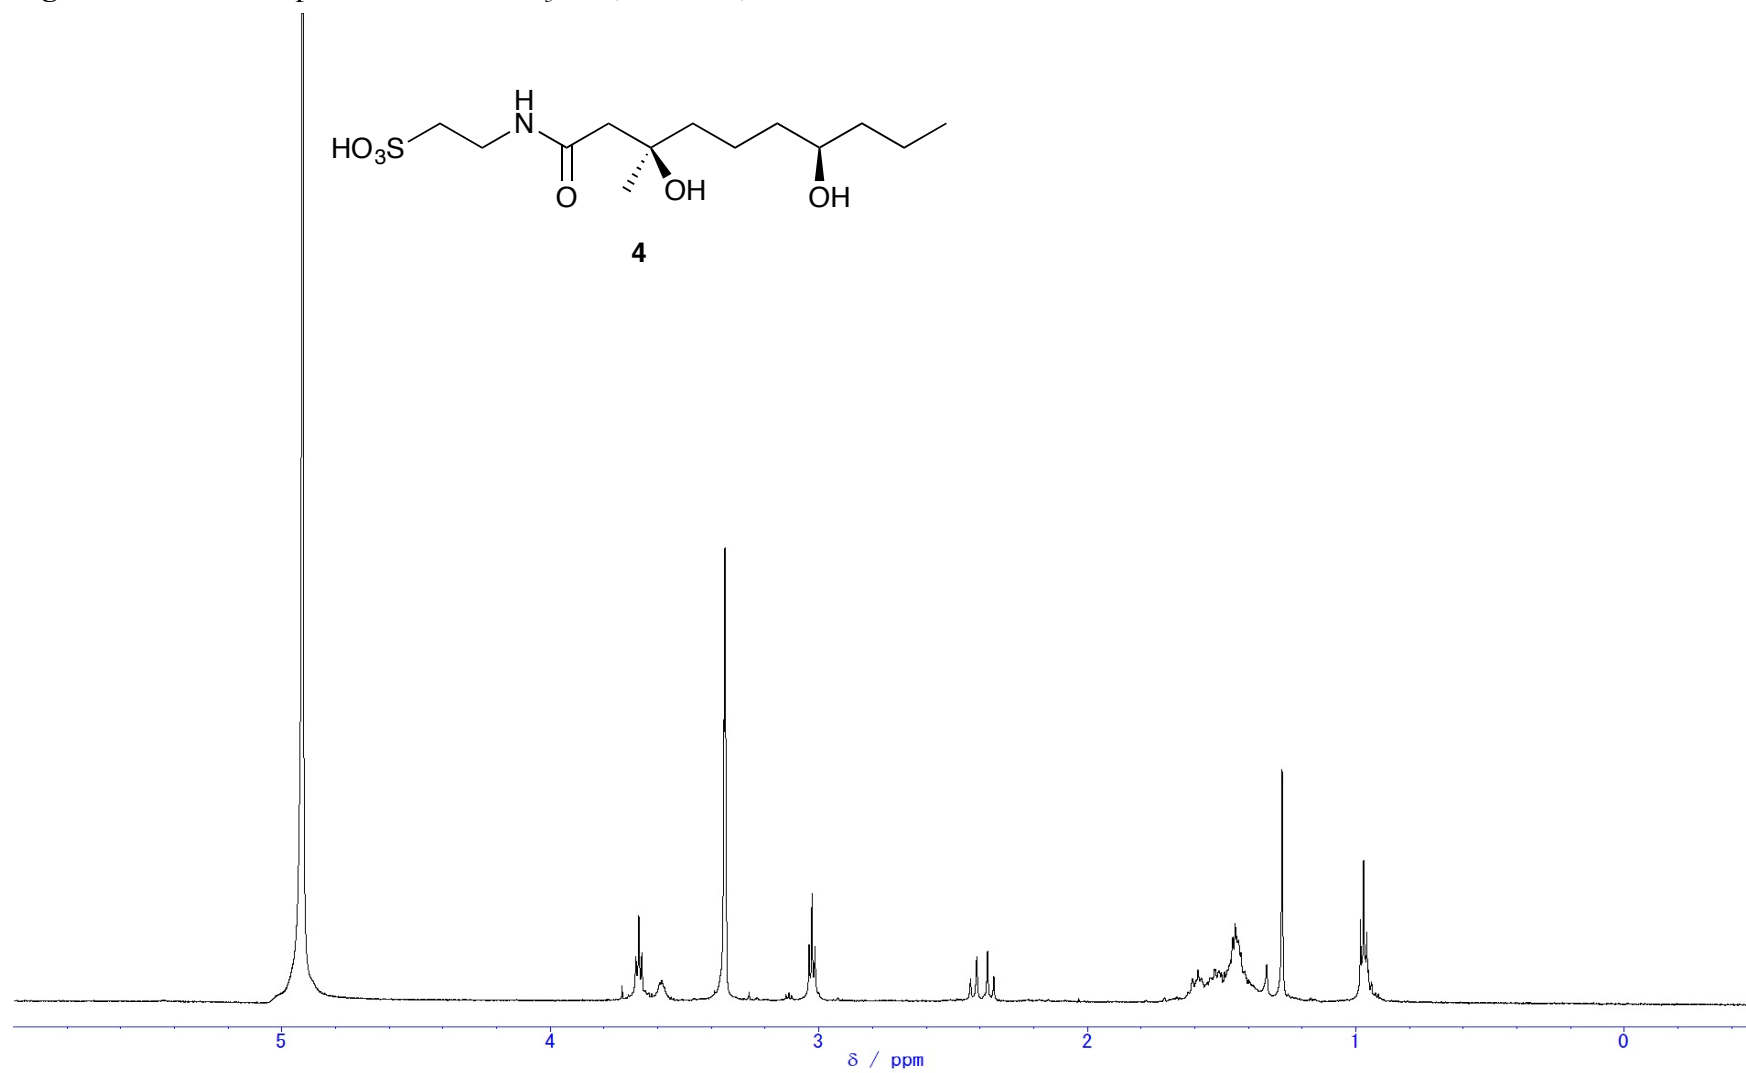

**Figure S10.**  $^1\text{H}$  NMR spectrum of **7** in  $\text{CDCl}_3$  (500 MHz).

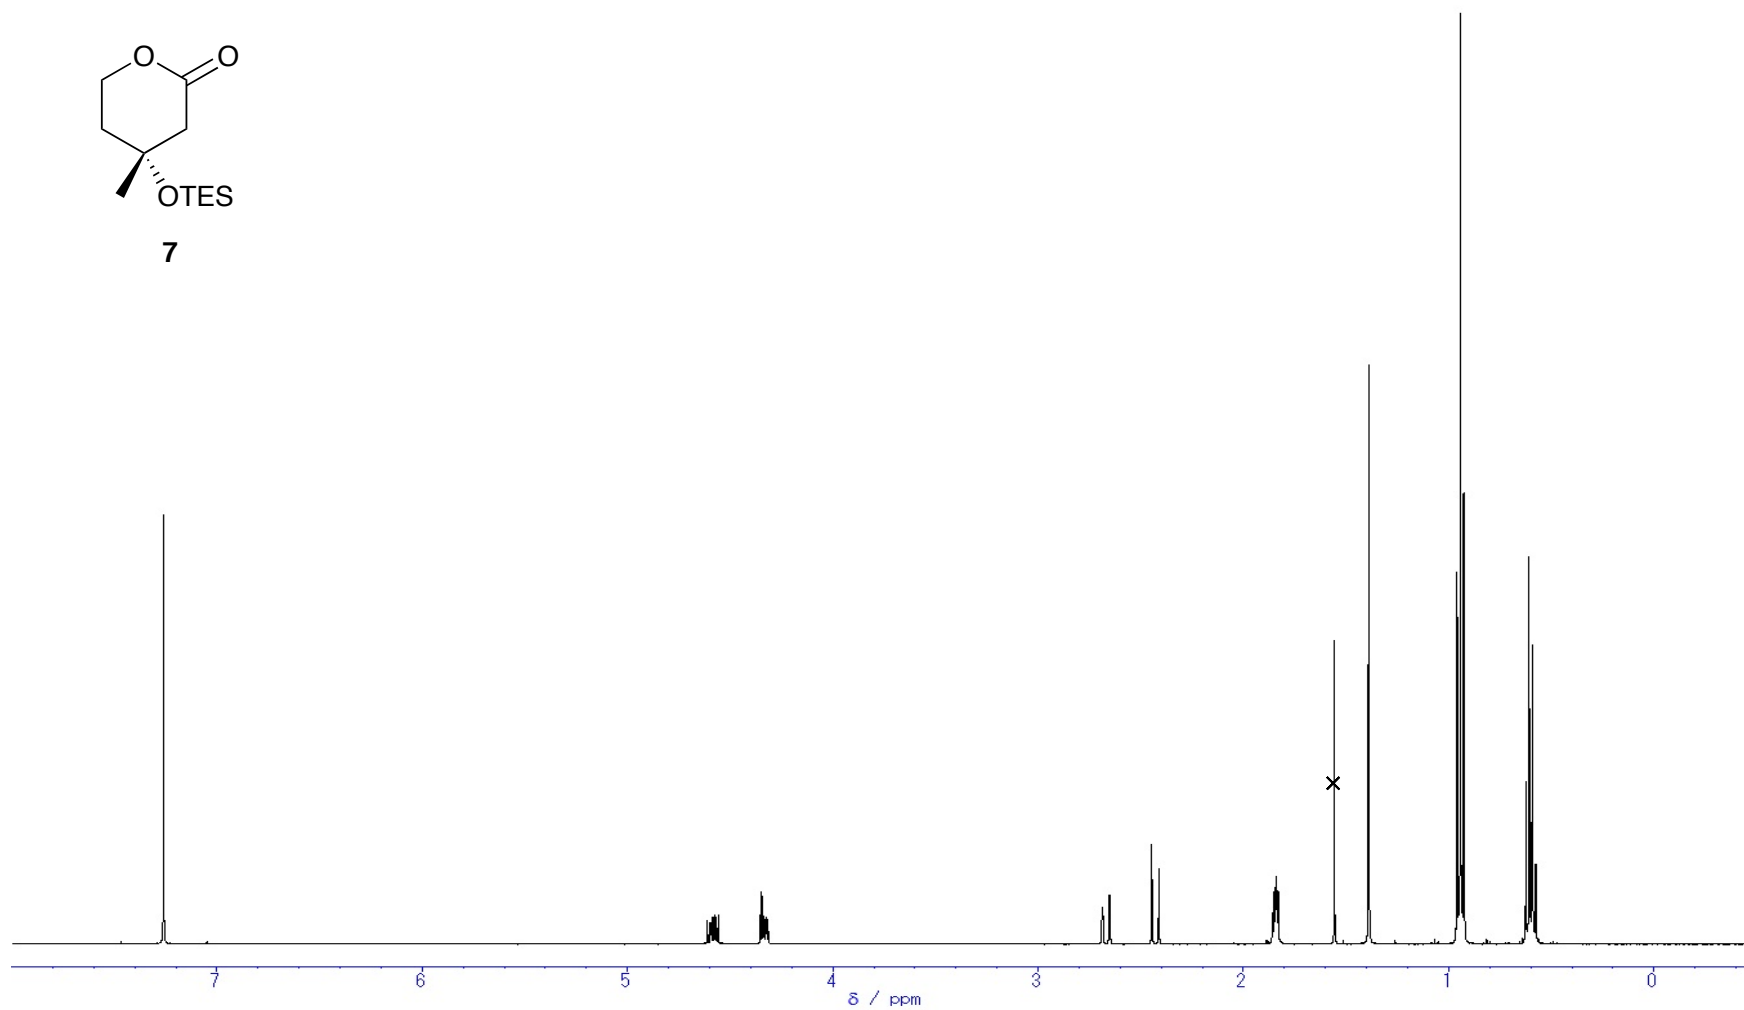

**Figure S11.**  $^{13}\text{C}$  NMR spectrum of **7** in  $\text{CDCl}_3$  (100 MHz).

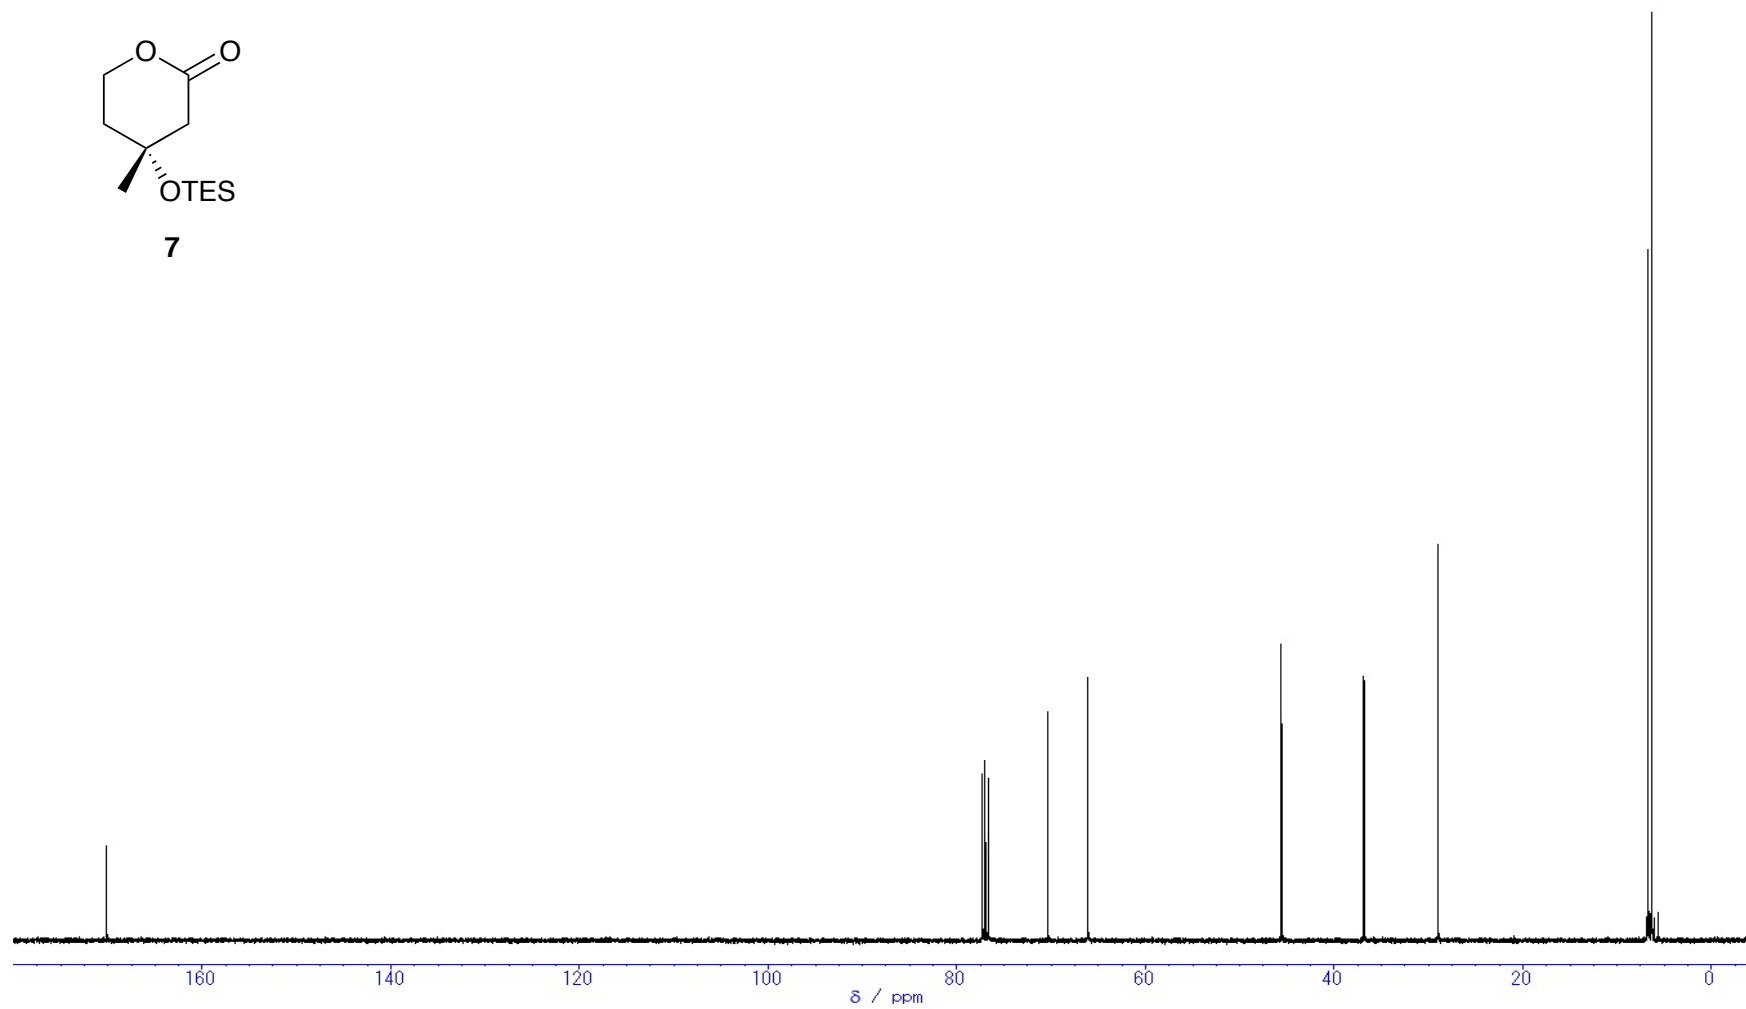

**Figure S12.**  $^1\text{H}$  NMR spectrum of **12** in  $\text{CDCl}_3$  (400 MHz).

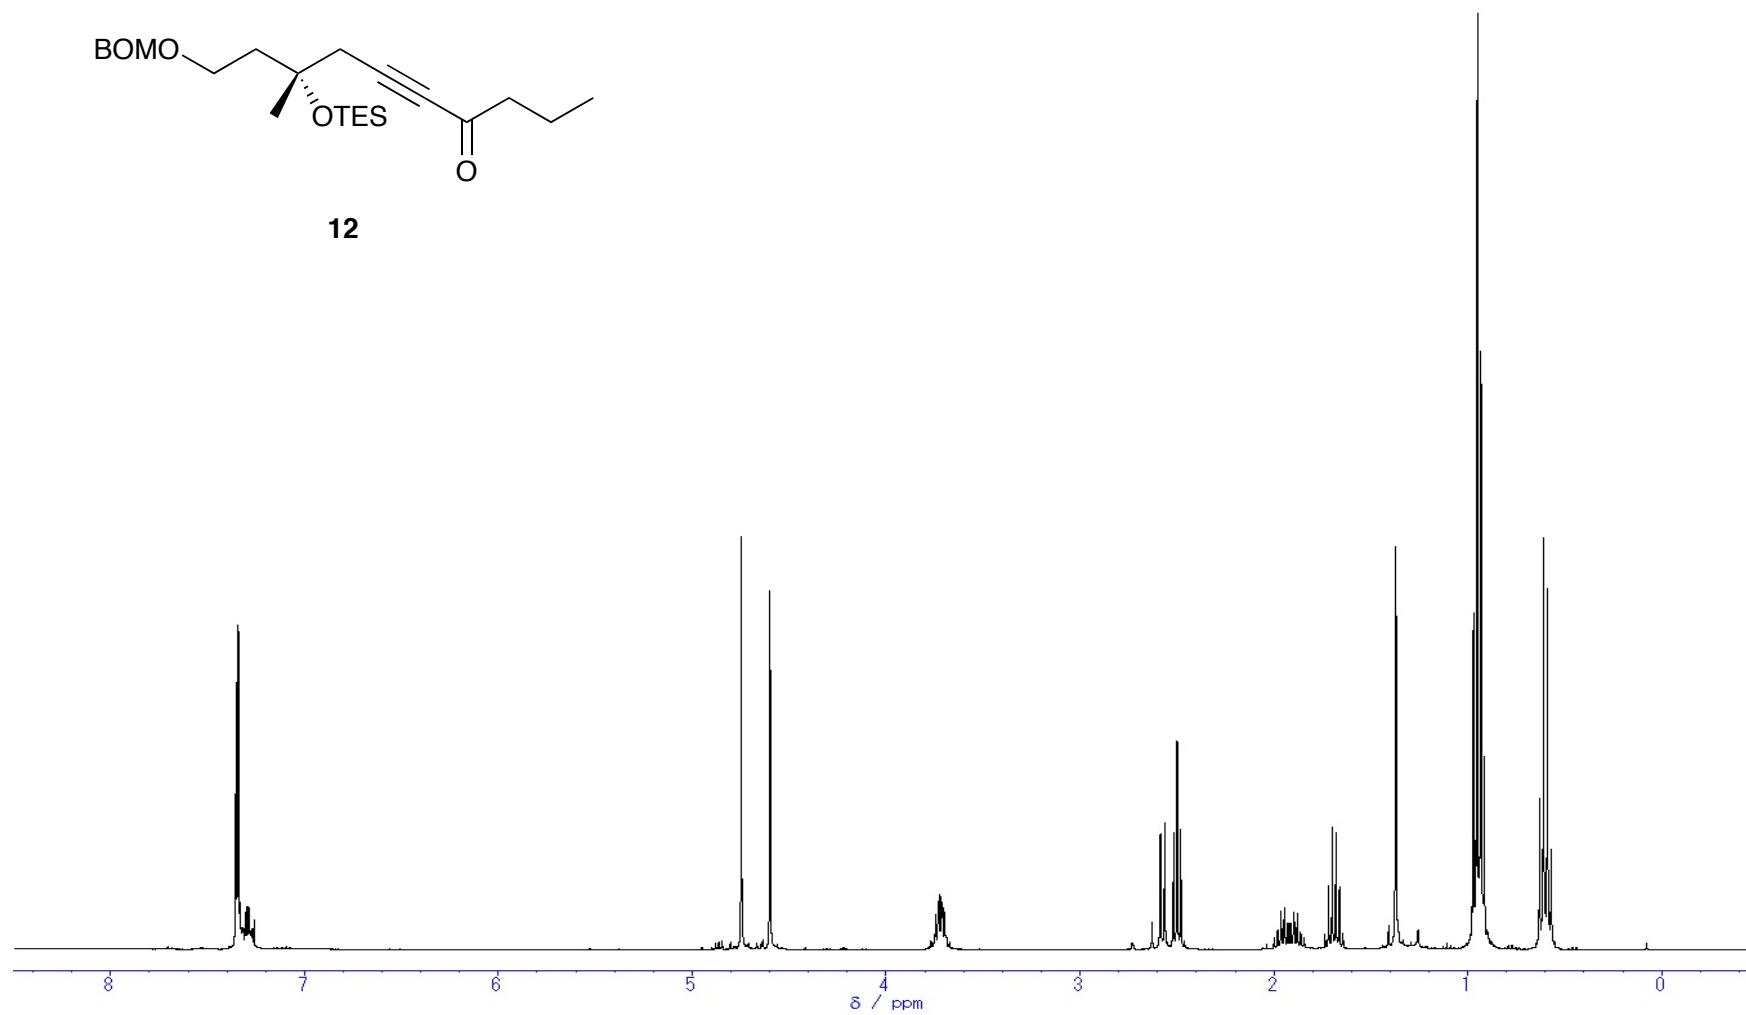

**Figure S13.**  $^{13}\text{C}$  NMR spectrum of **12** in  $\text{CDCl}_3$  (150 MHz).

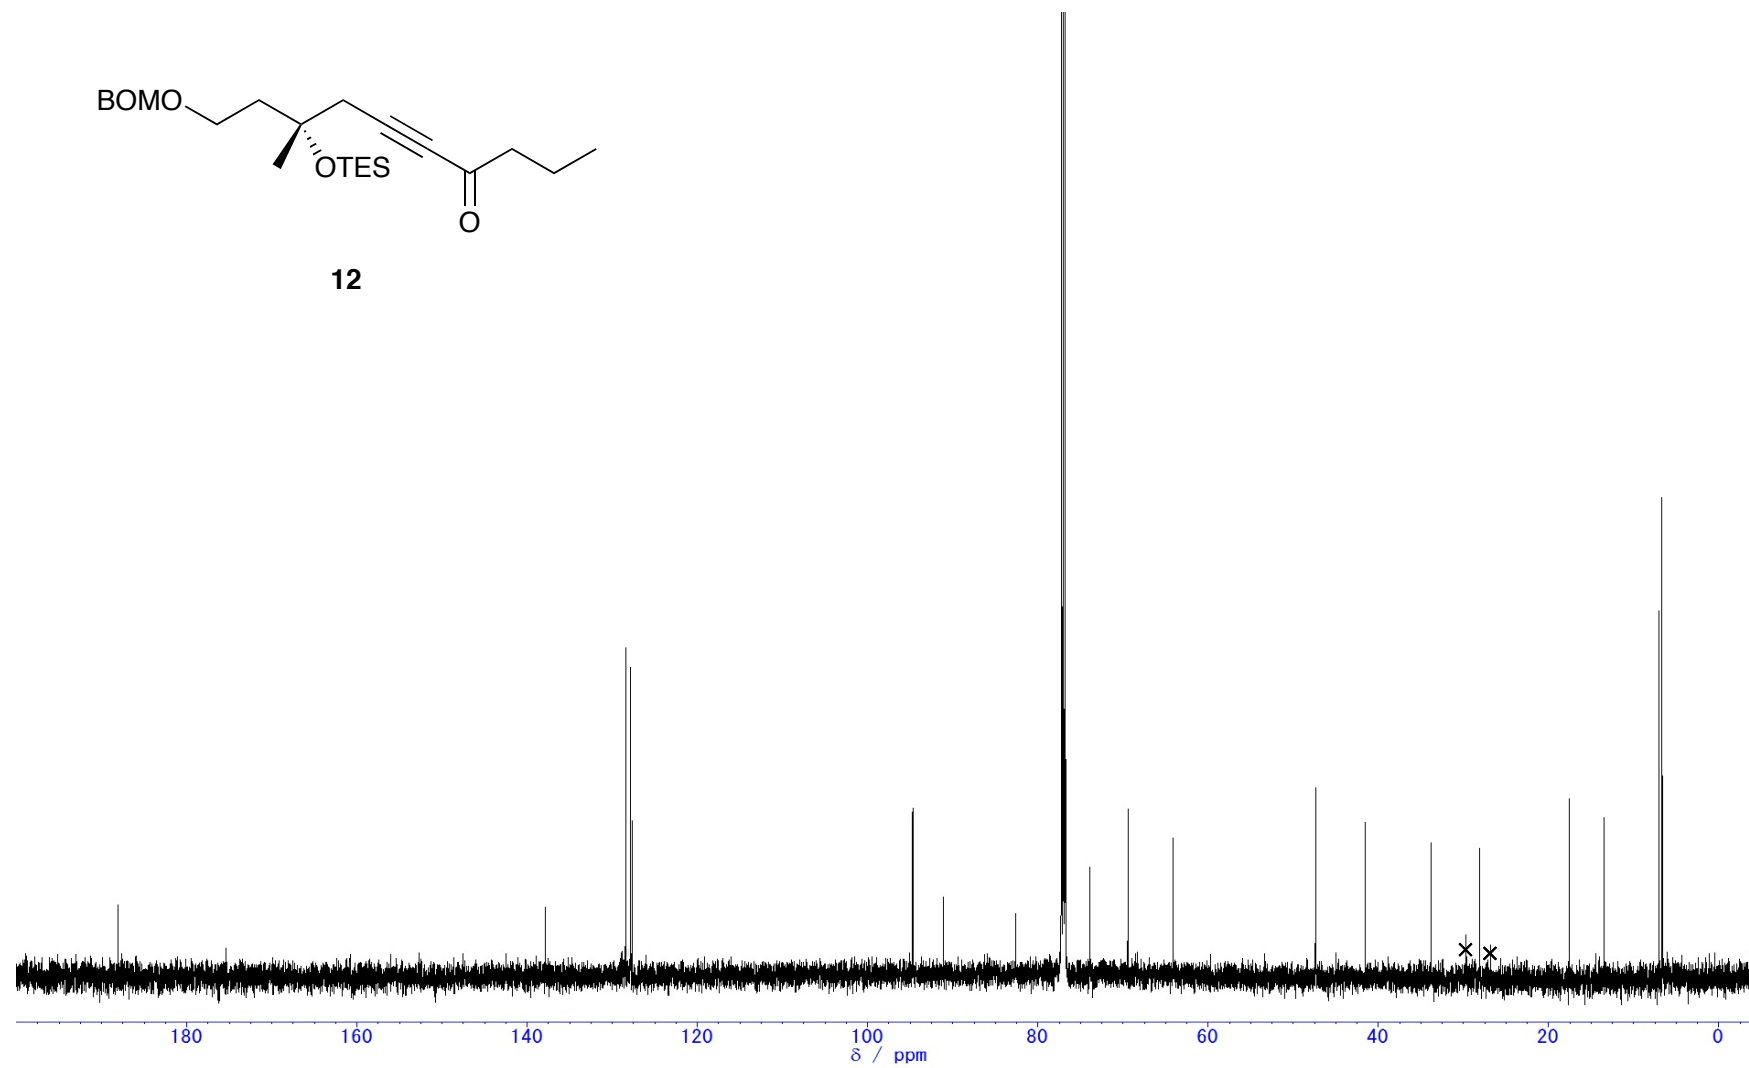

**Figure S14.**  $^1\text{H}$  NMR spectrum of **11a** in  $\text{CDCl}_3$  (400 MHz).

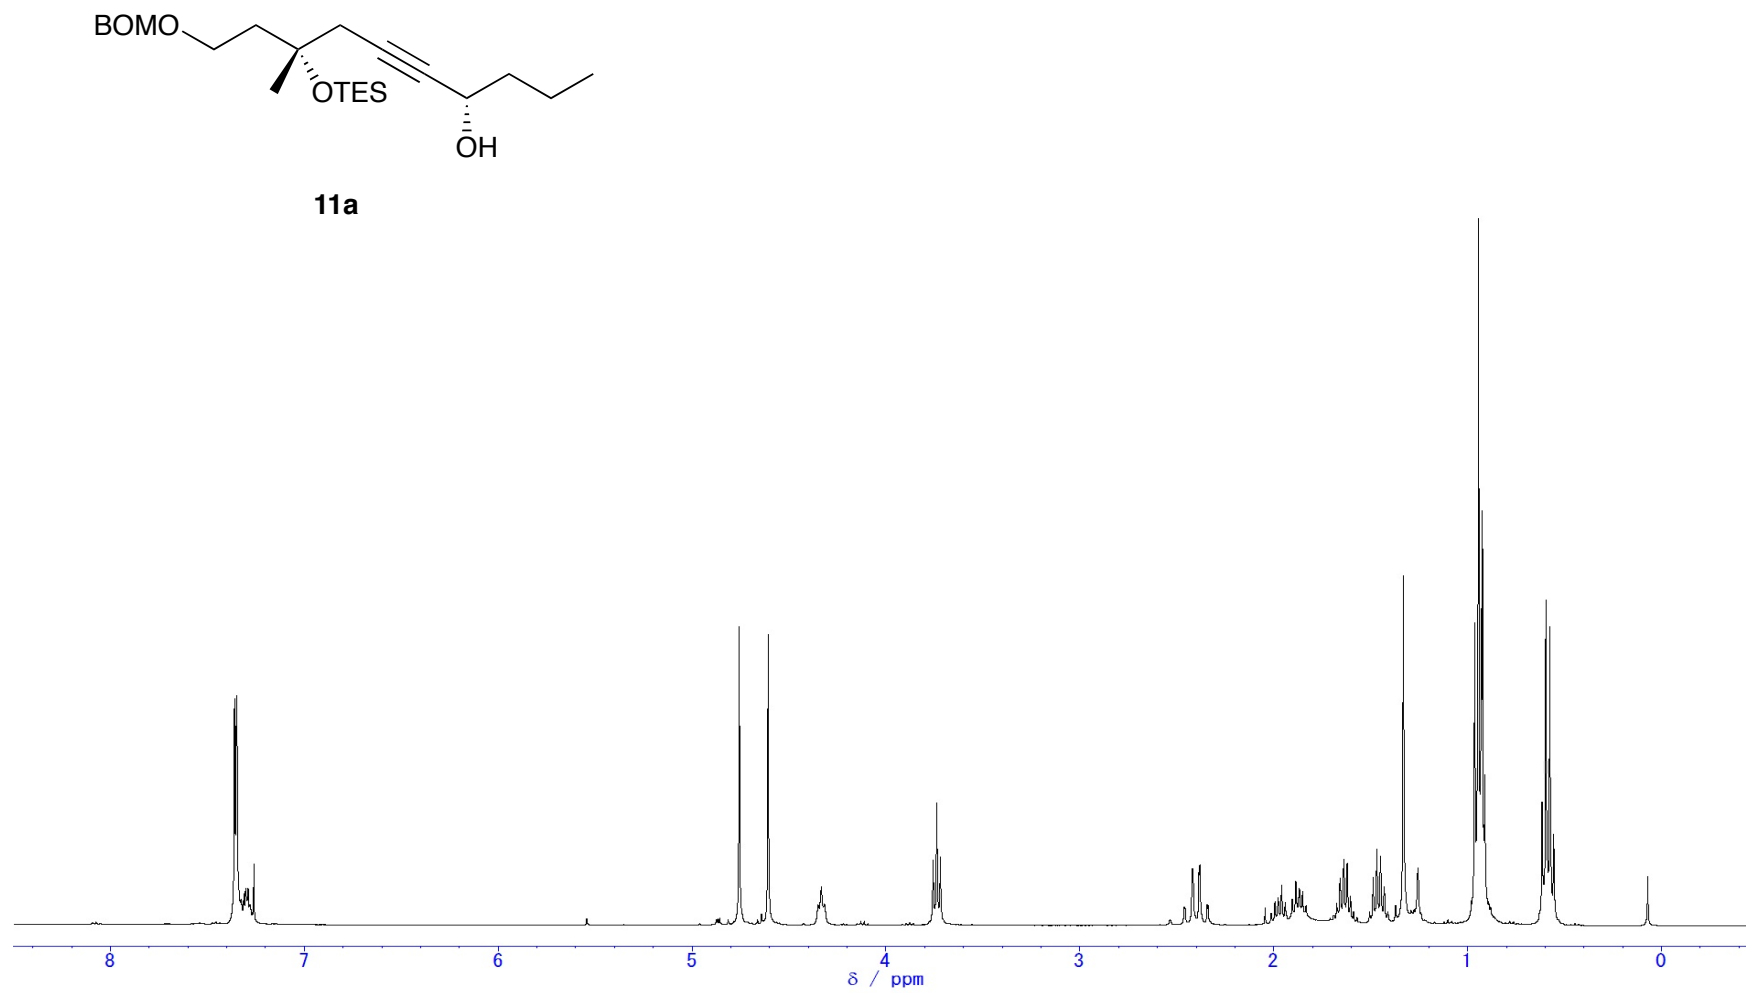



**Figure S15.**  $^{13}\text{C}$  NMR spectrum of **11a** in  $\text{CDCl}_3$  (100 MHz).

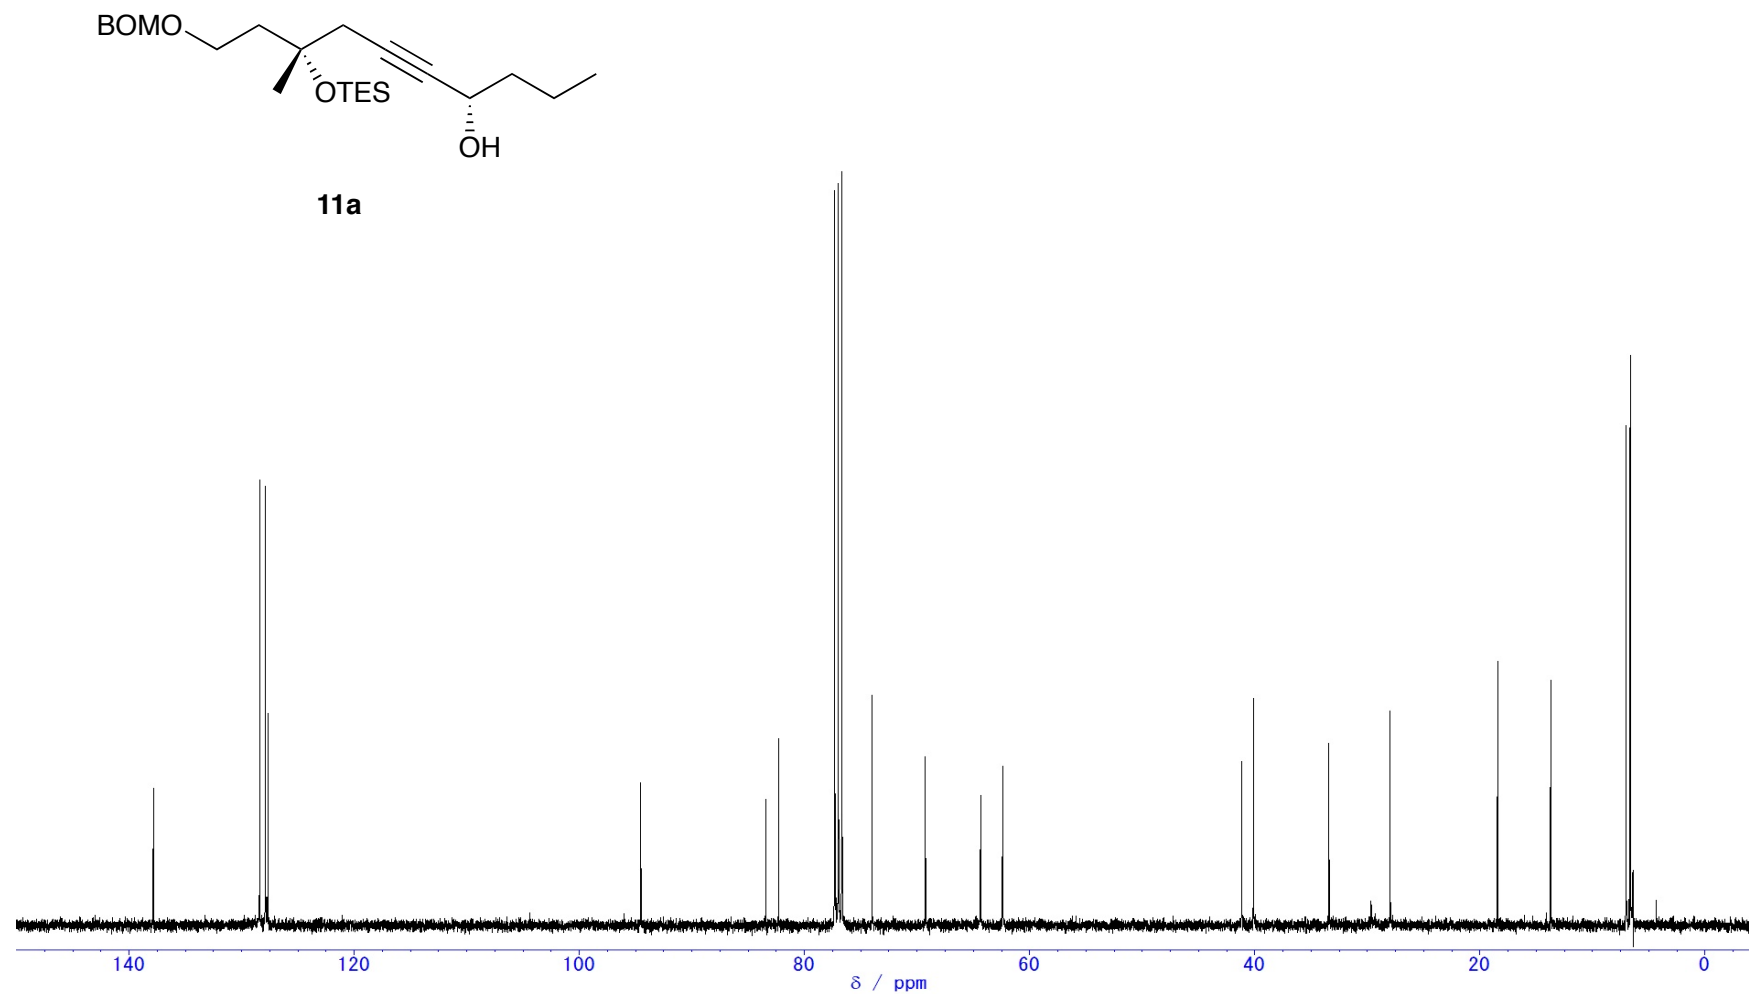

**Figure S16.**  $^1\text{H}$  NMR spectrum of **11b** in  $\text{CDCl}_3$  (400 MHz).

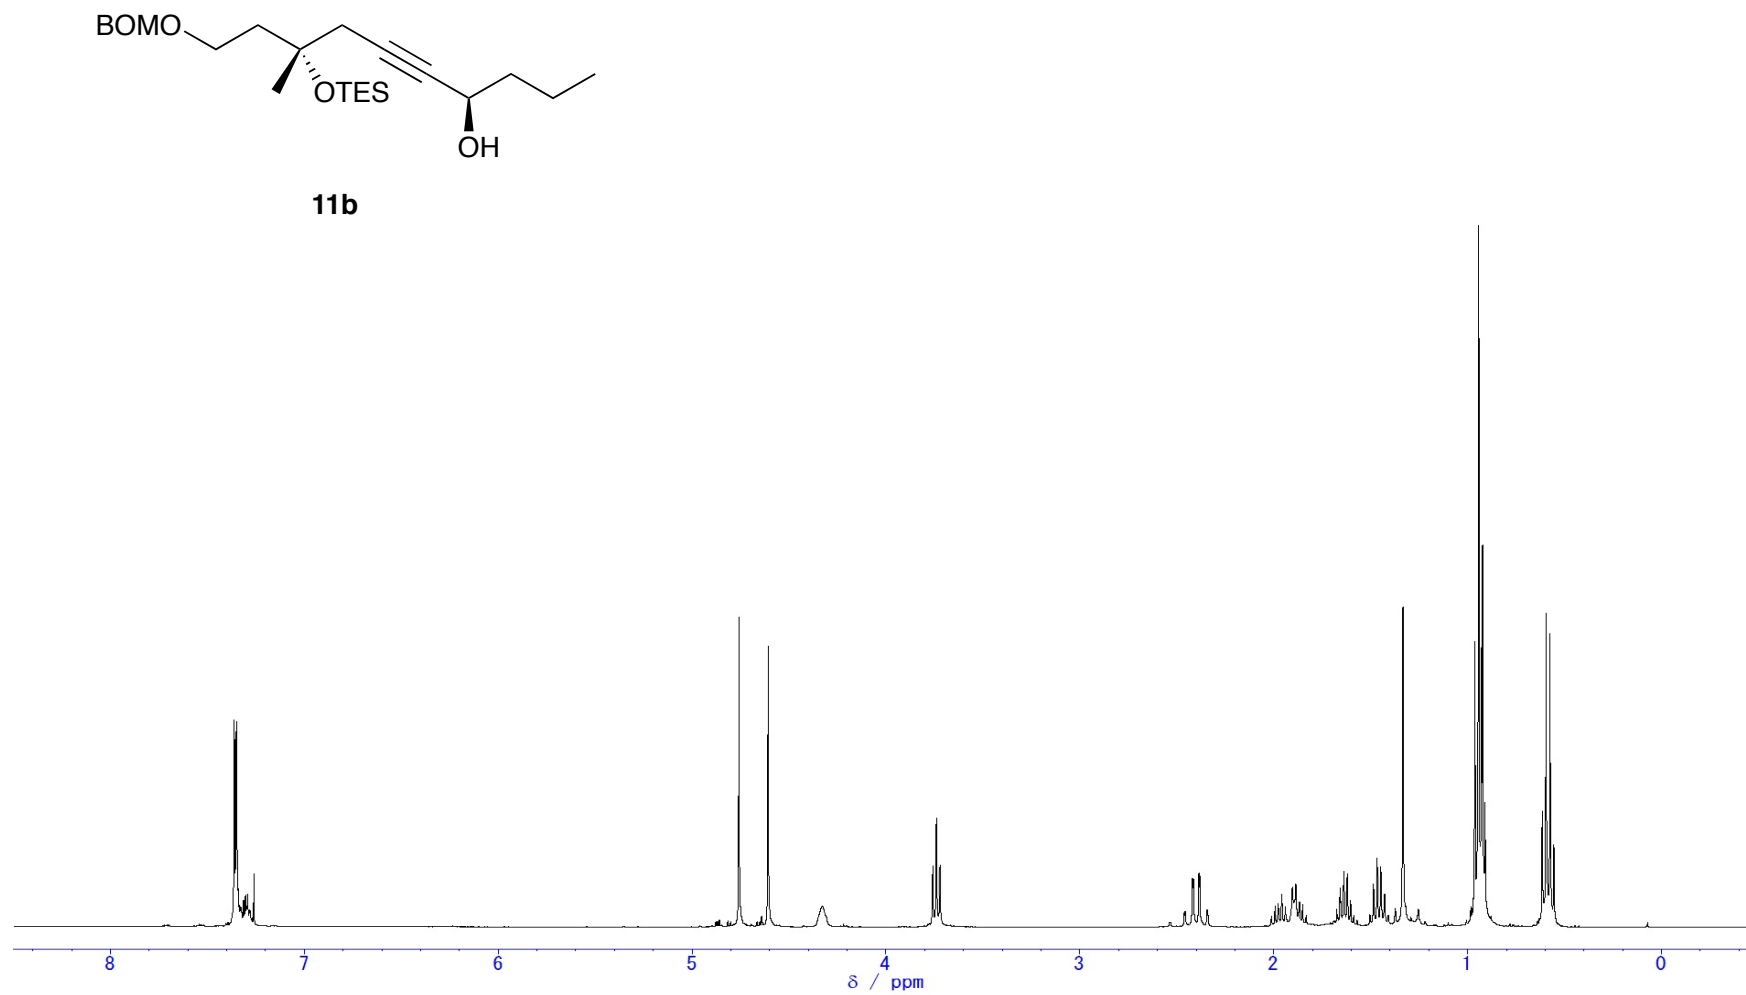

**Figure S17.**  $^{13}\text{C}$  NMR spectrum of **11b** in  $\text{CDCl}_3$  (100 MHz).

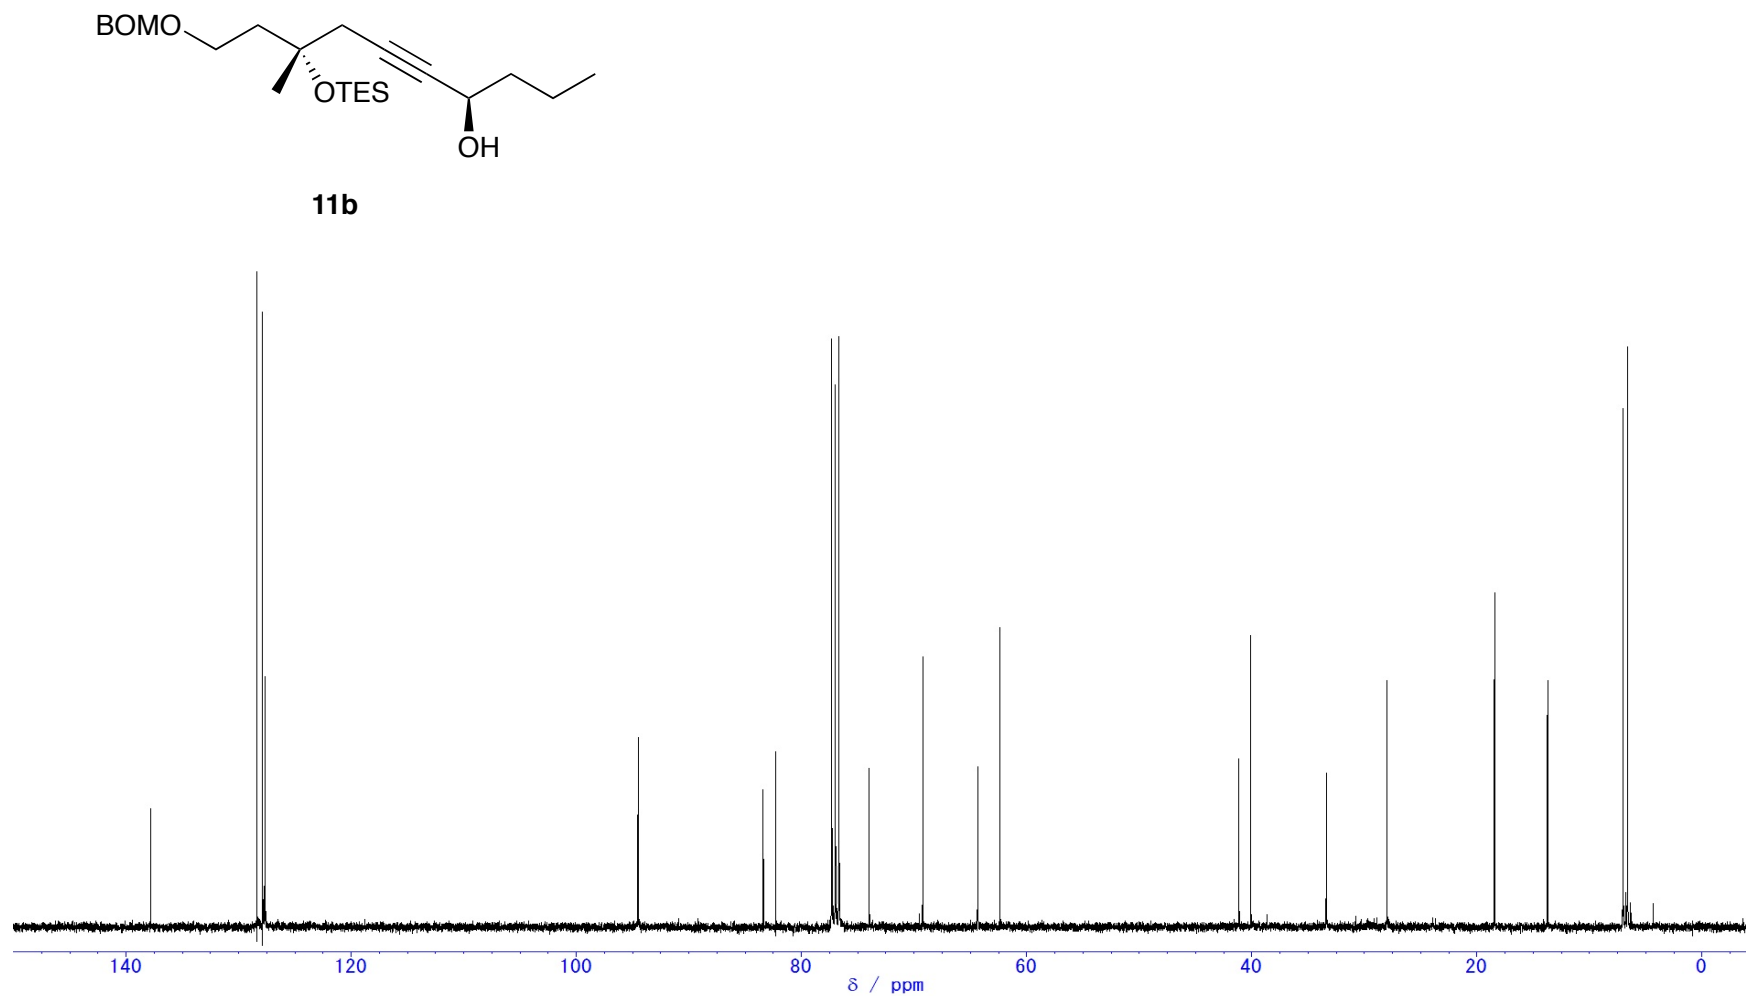

**Figure S18.**  $^1\text{H}$  NMR spectrum of **13a** in  $\text{CDCl}_3$  (400 MHz).

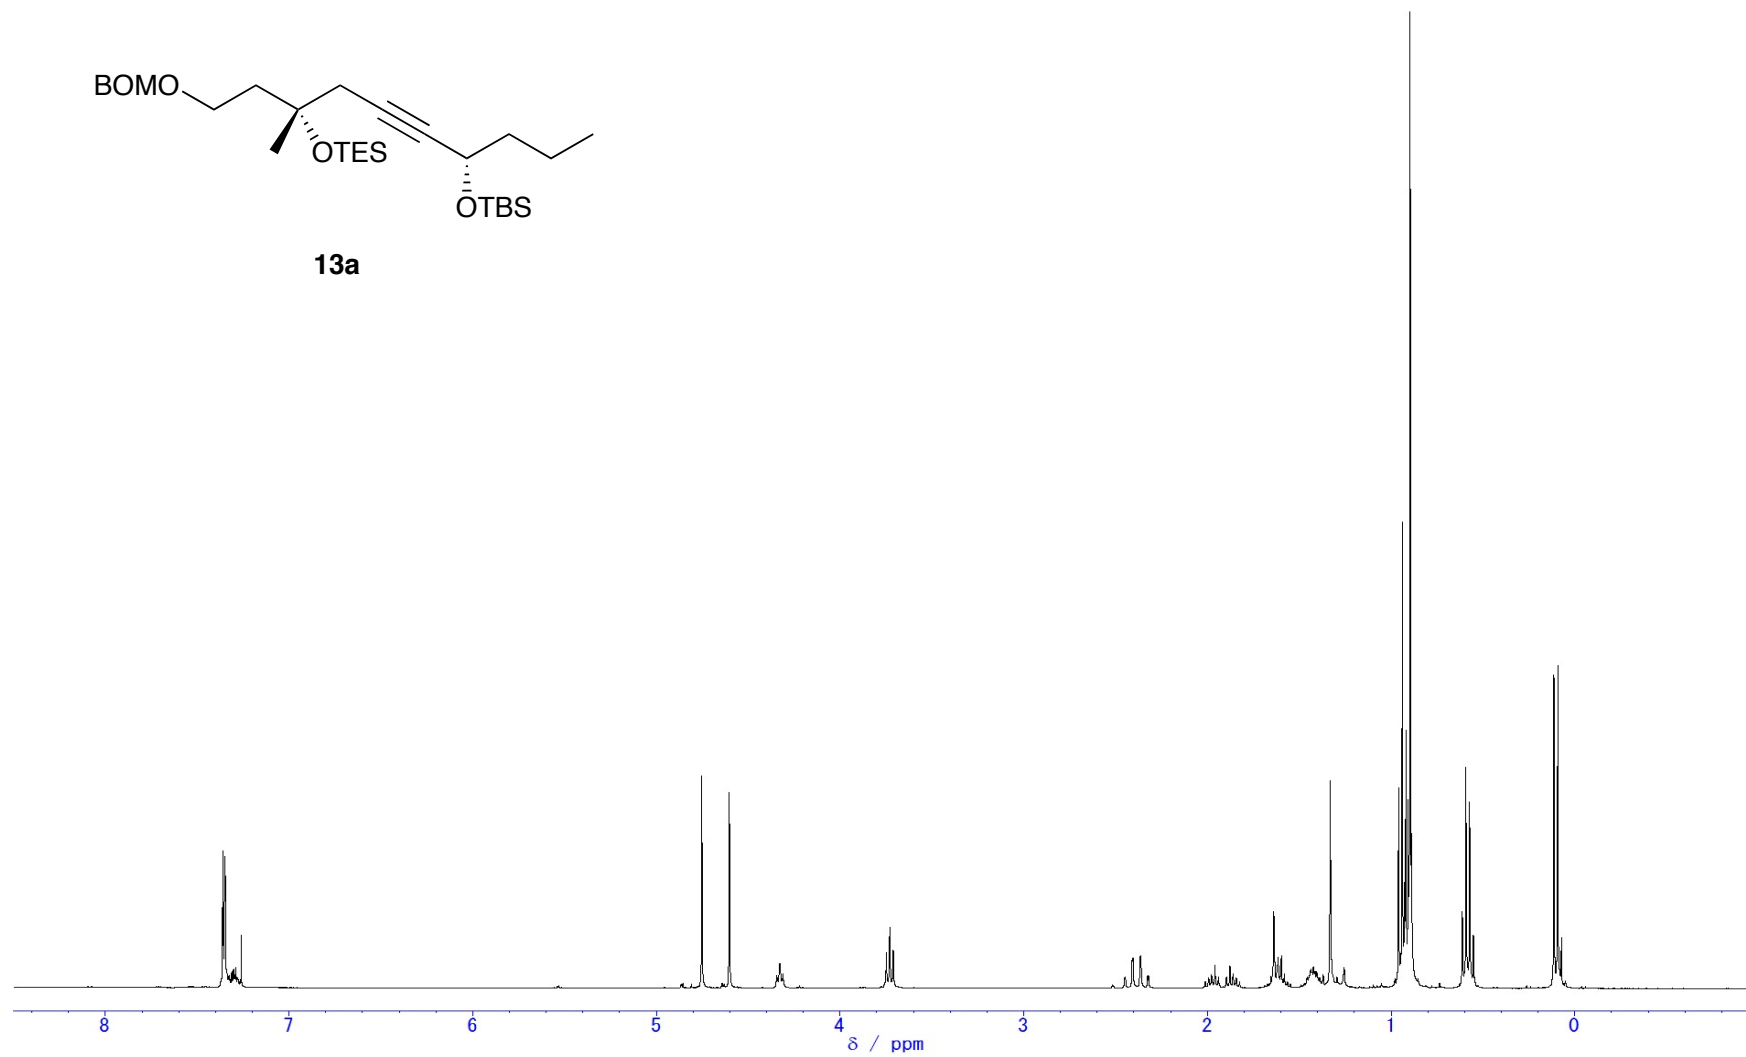

**Figure S19.**  $^{13}\text{C}$  NMR spectrum of **13a** in  $\text{CDCl}_3$  (100 MHz).

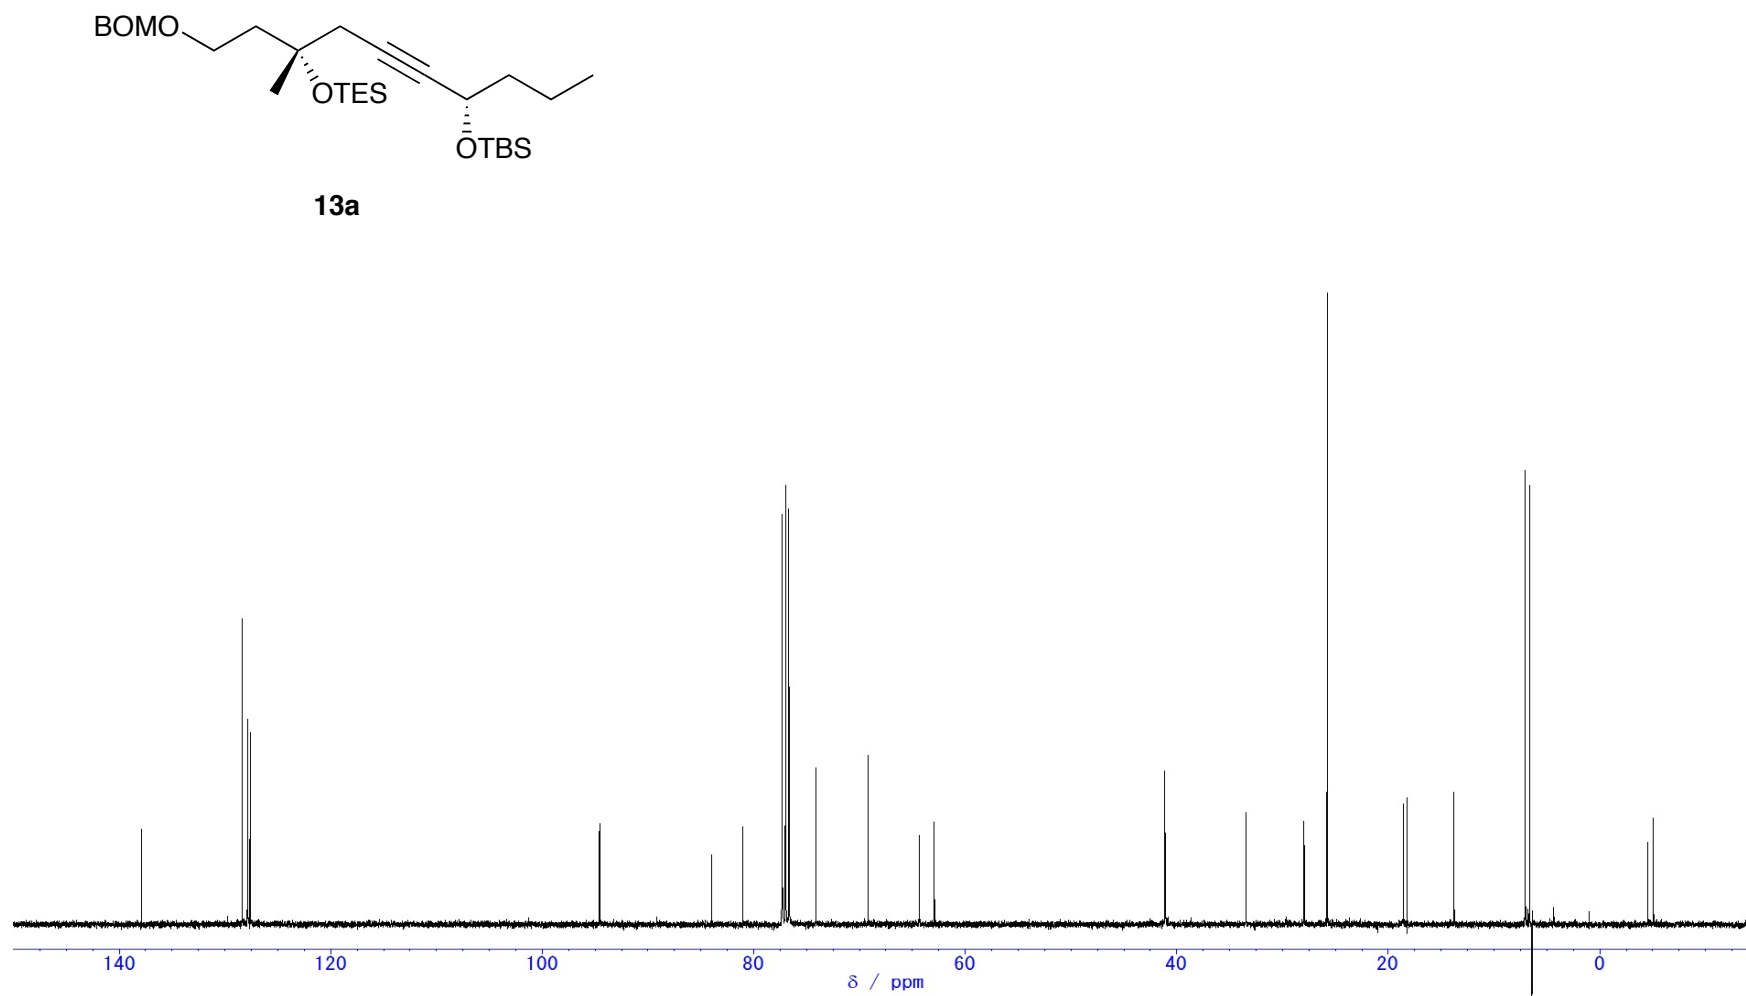

**Figure S20.**  $^1\text{H}$  NMR spectrum of **13b** in  $\text{CDCl}_3$  (400 MHz).

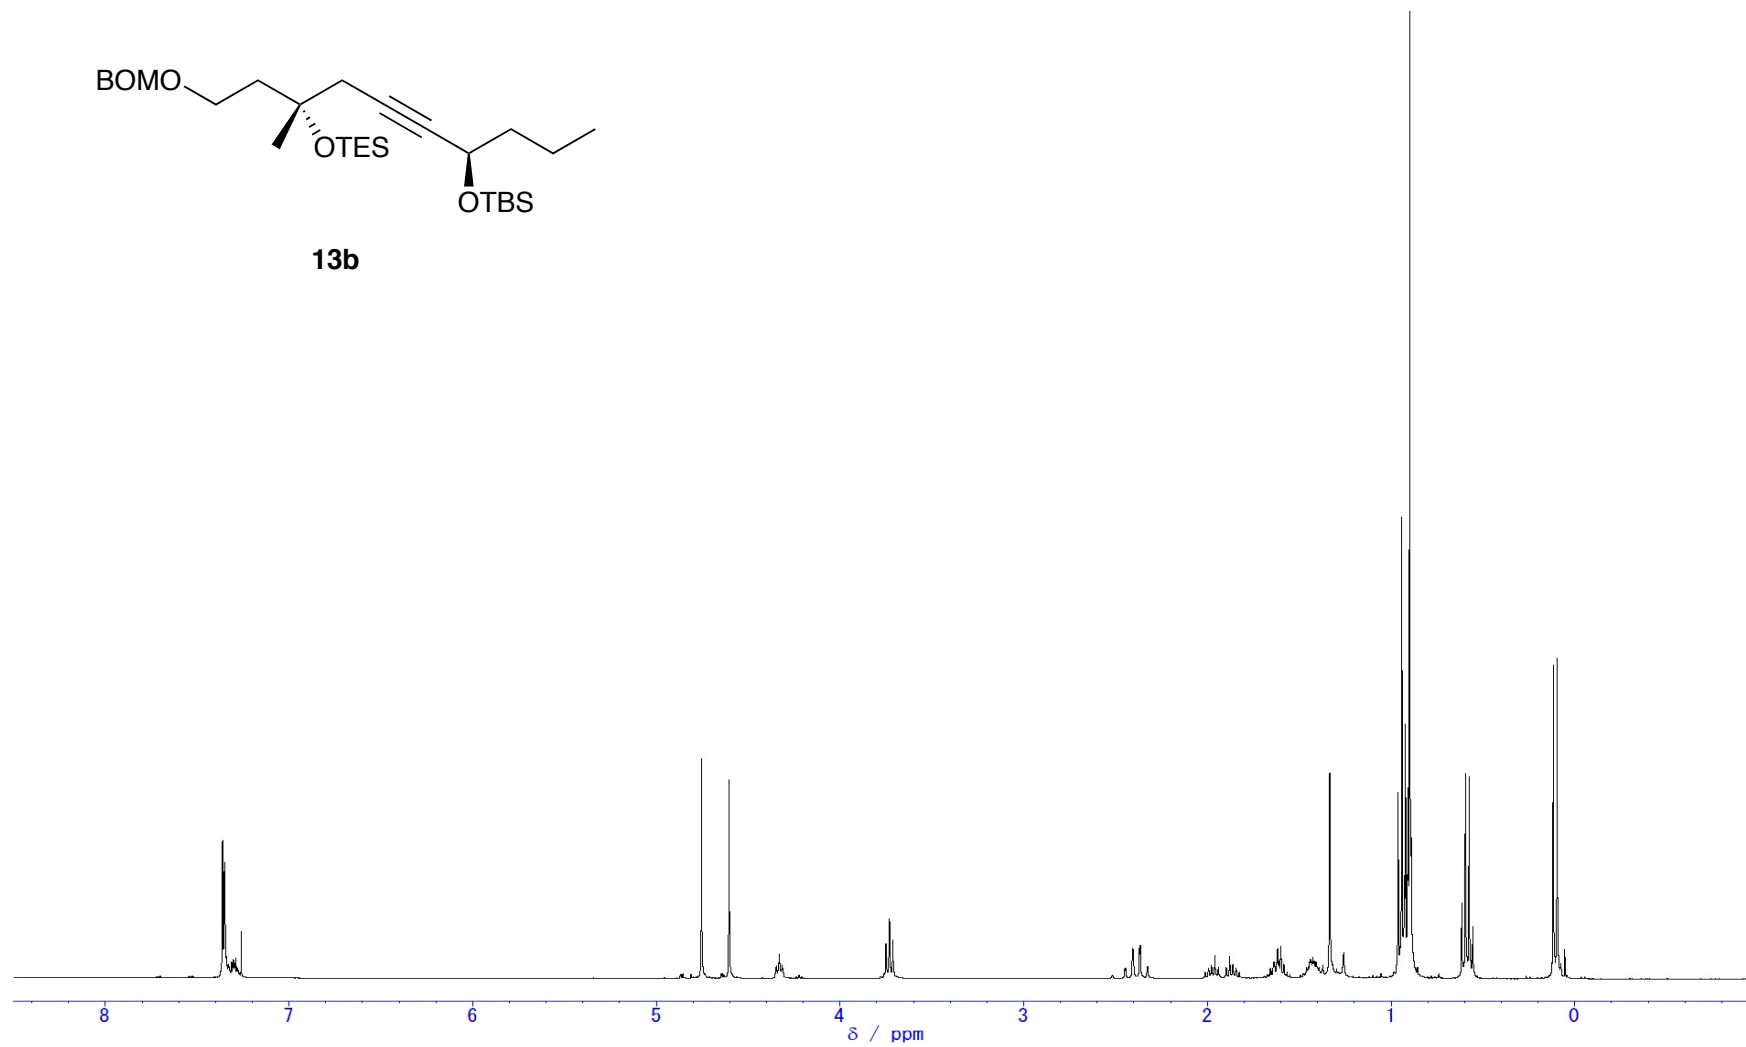



**Figure S22.**  $^1\text{H}$  NMR spectrum of **14a** in  $\text{CDCl}_3$  (400 MHz).

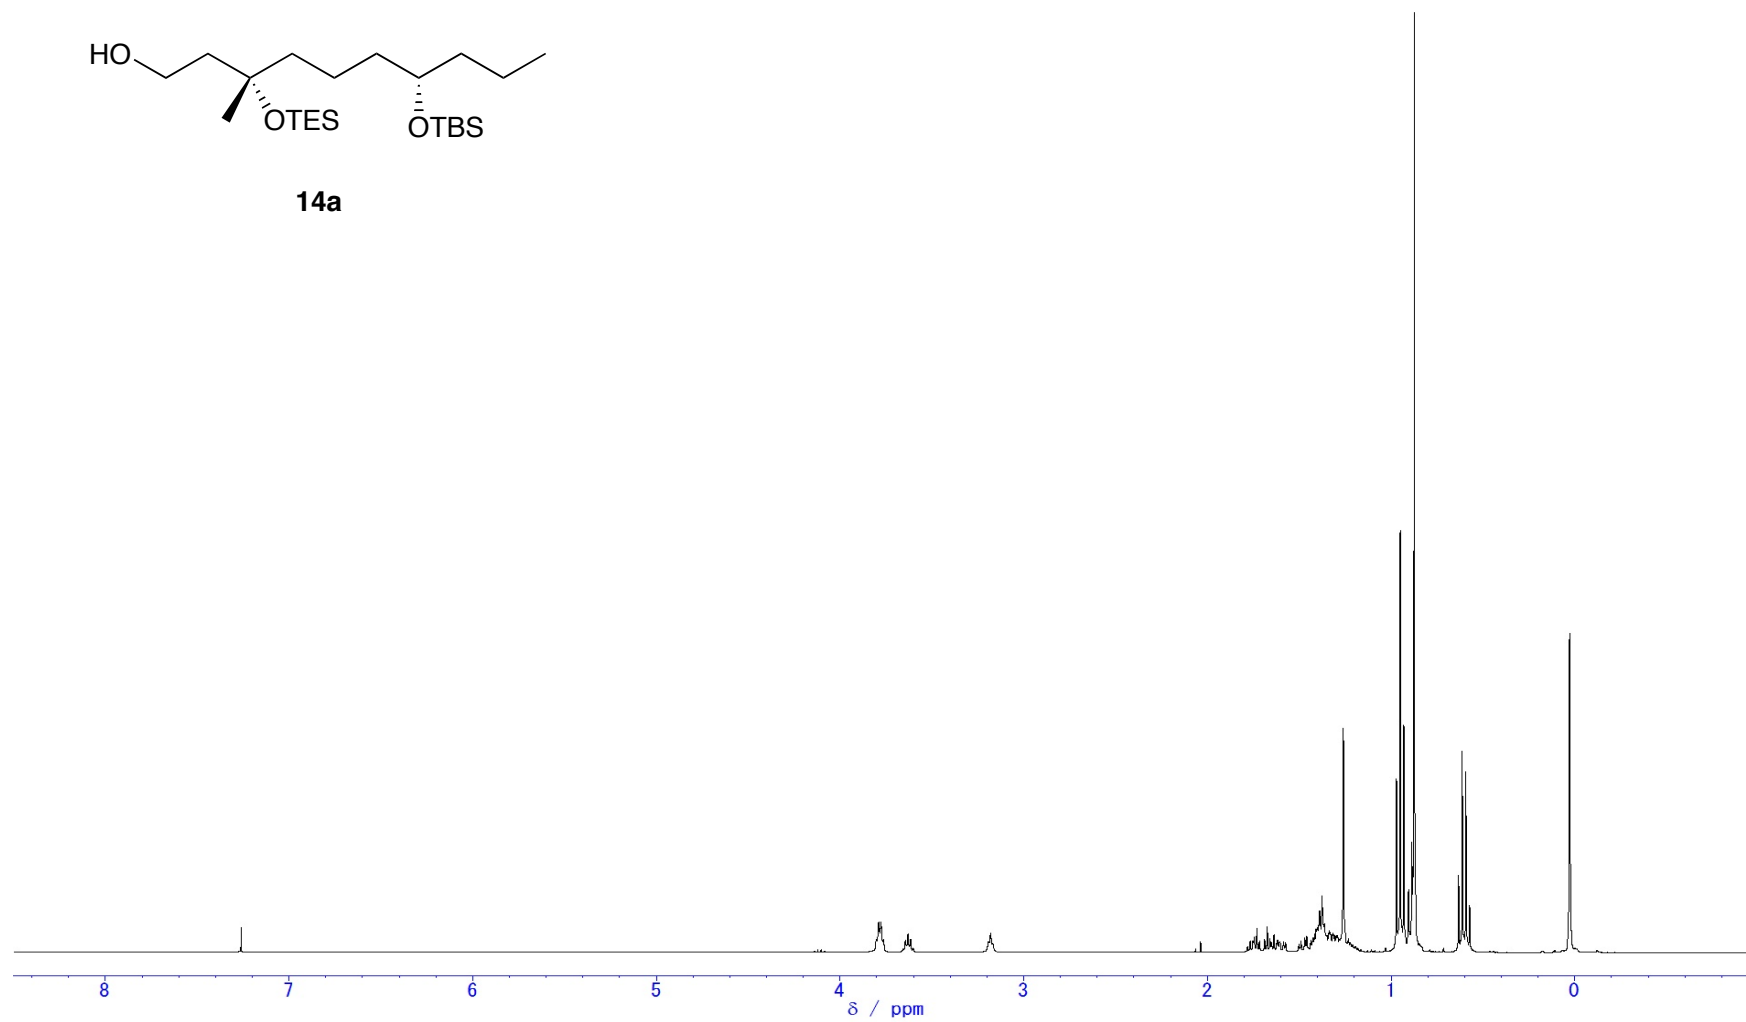



**Figure S23.**  $^{13}\text{C}$  NMR spectrum of **14a** in  $\text{CDCl}_3$  (100 MHz).

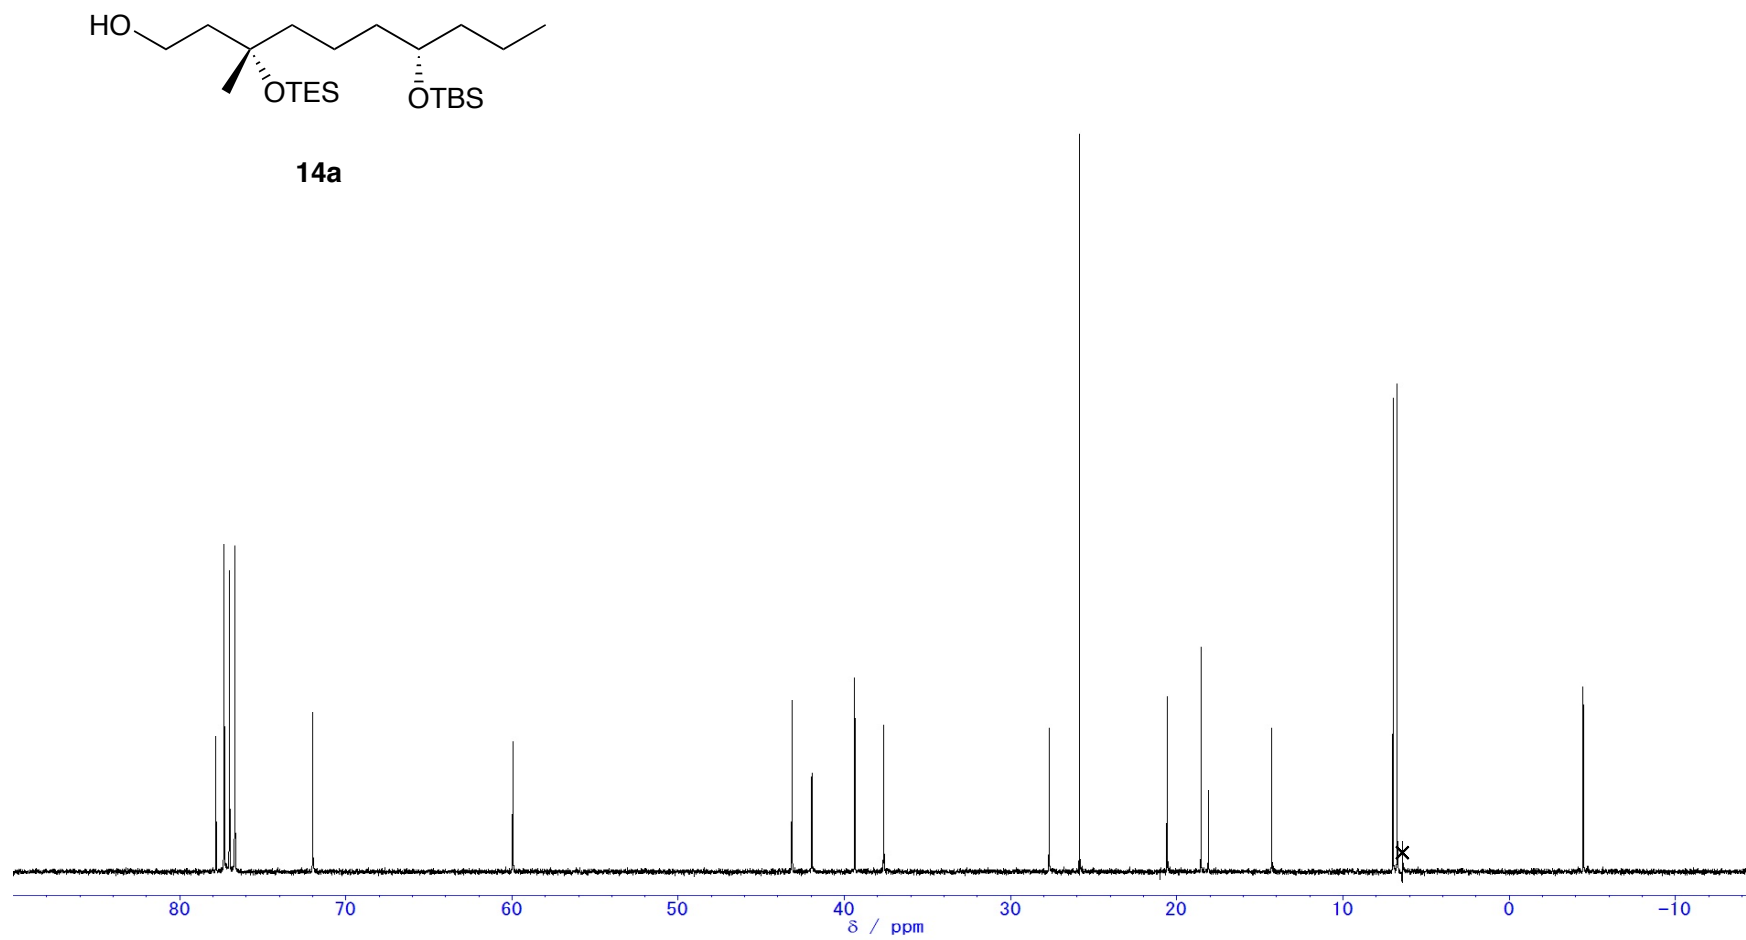

**Figure S24.**  $^1\text{H}$  NMR spectrum of **14b** in  $\text{CDCl}_3$  (400 MHz).

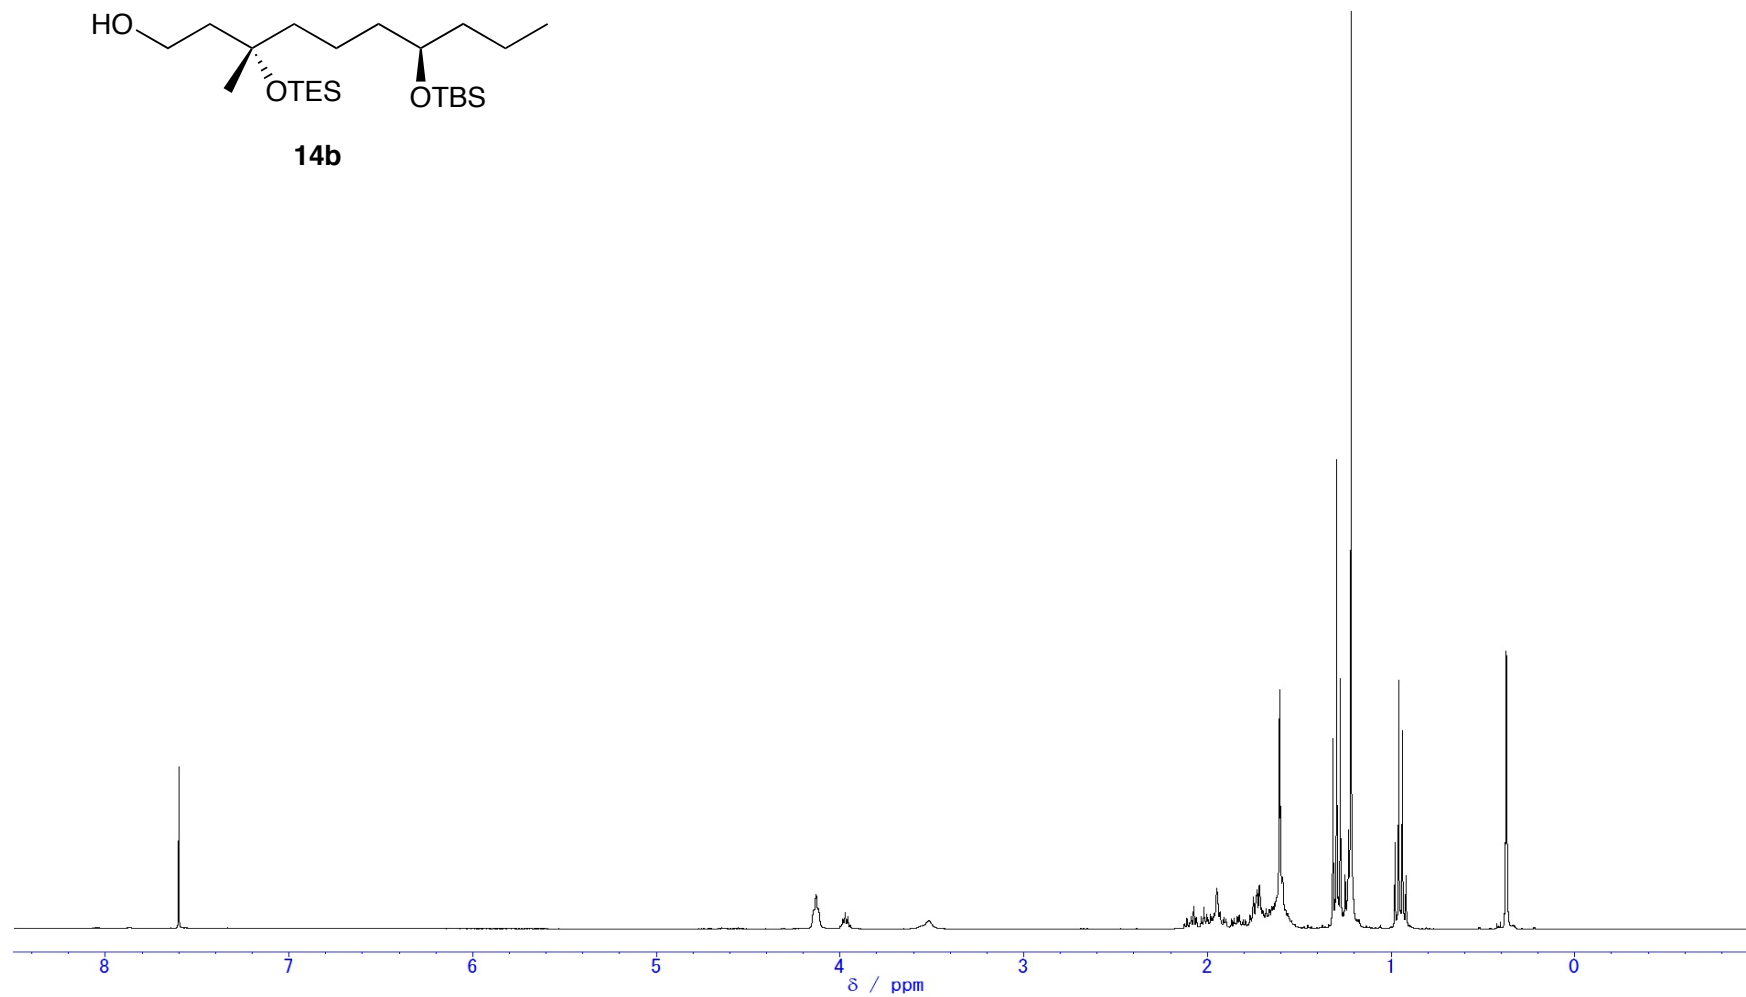

Figure S25.  $^{13}\text{C}$  NMR spectrum of **14b** in  $\text{CDCl}_3$  (100 MHz).

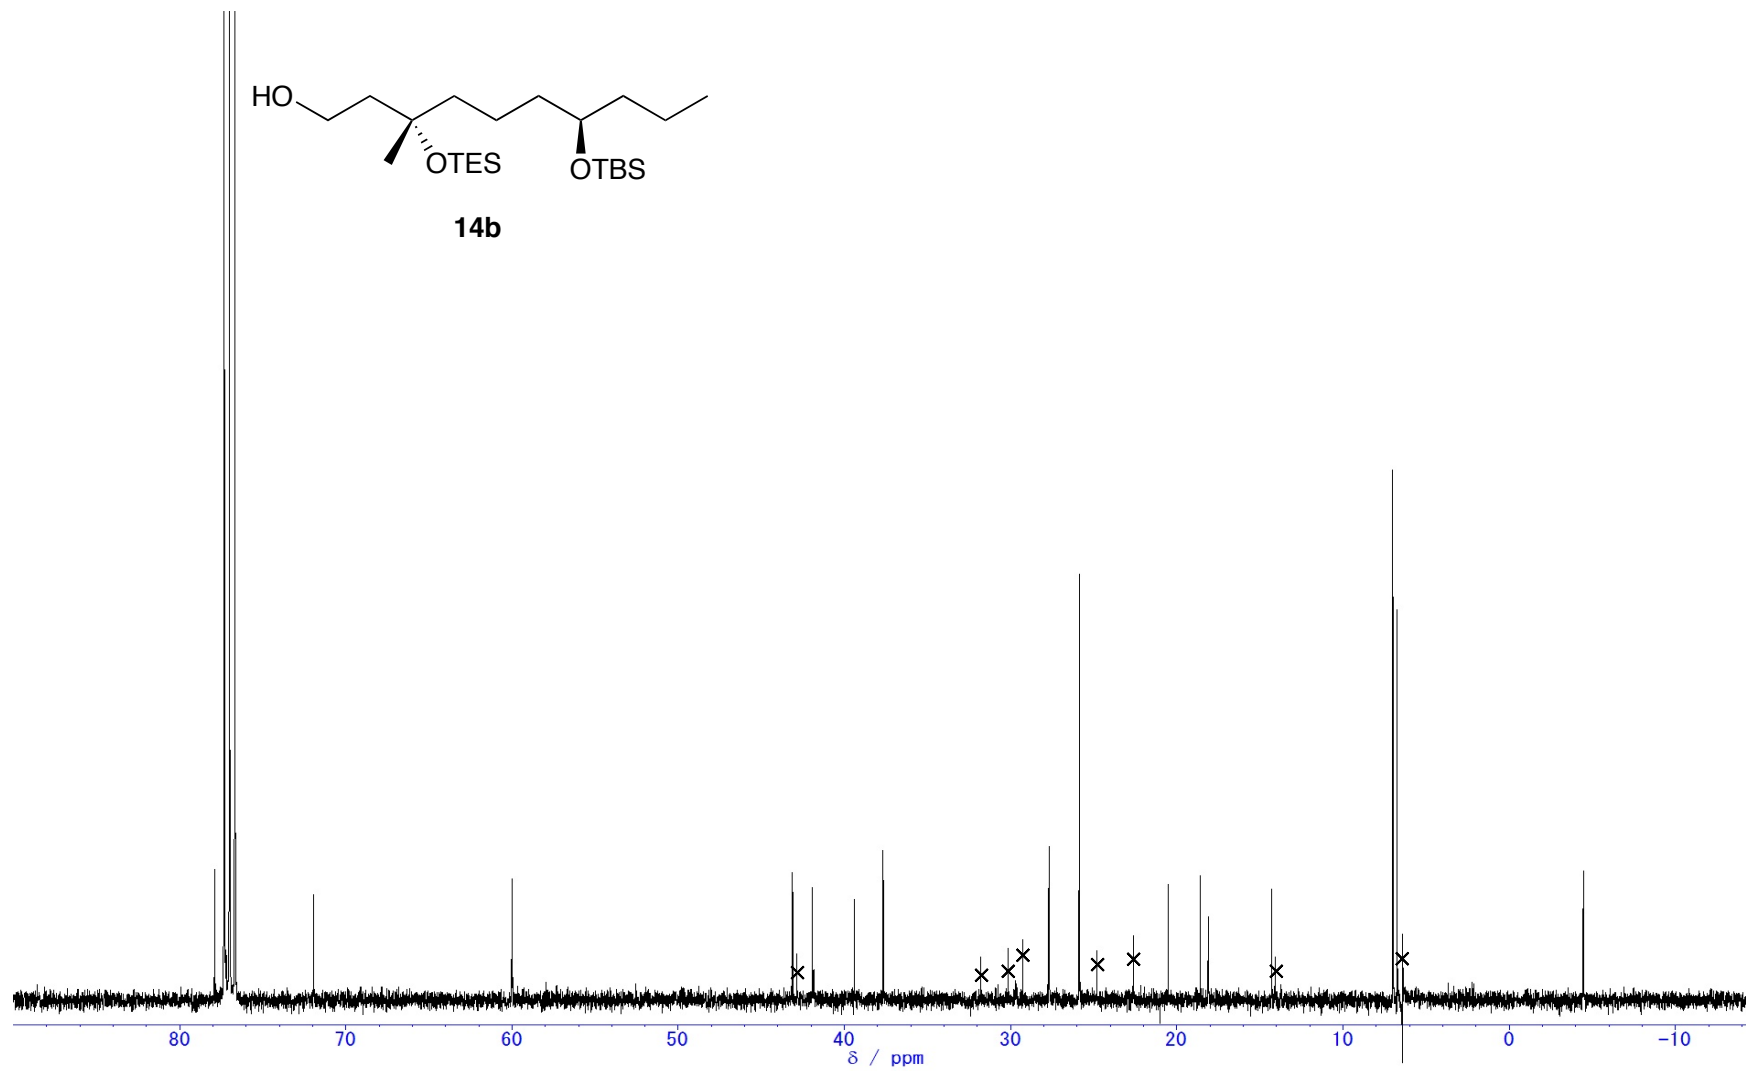

**Figure S26.**  $^1\text{H}$  NMR spectrum of **15a** in  $\text{CDCl}_3$  (400 MHz).

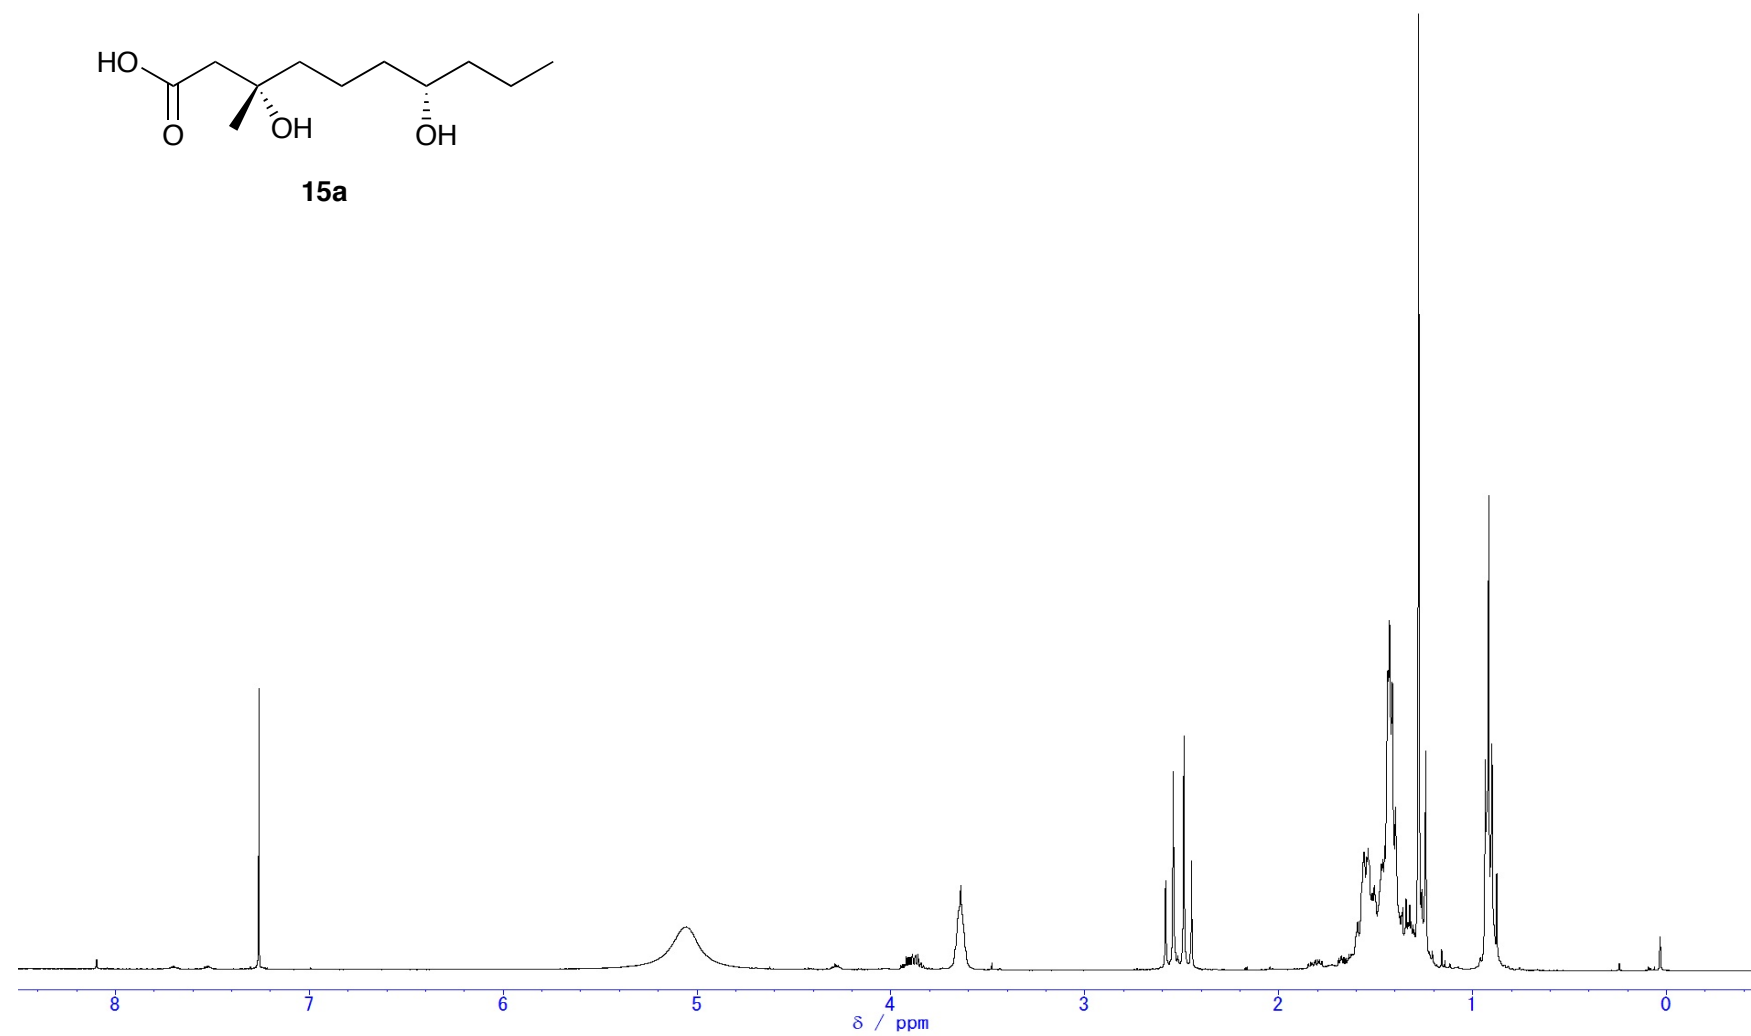

**Figure S27.**  $^{13}\text{C}$  NMR spectrum of **15a** in  $\text{CDCl}_3$  (100 MHz).

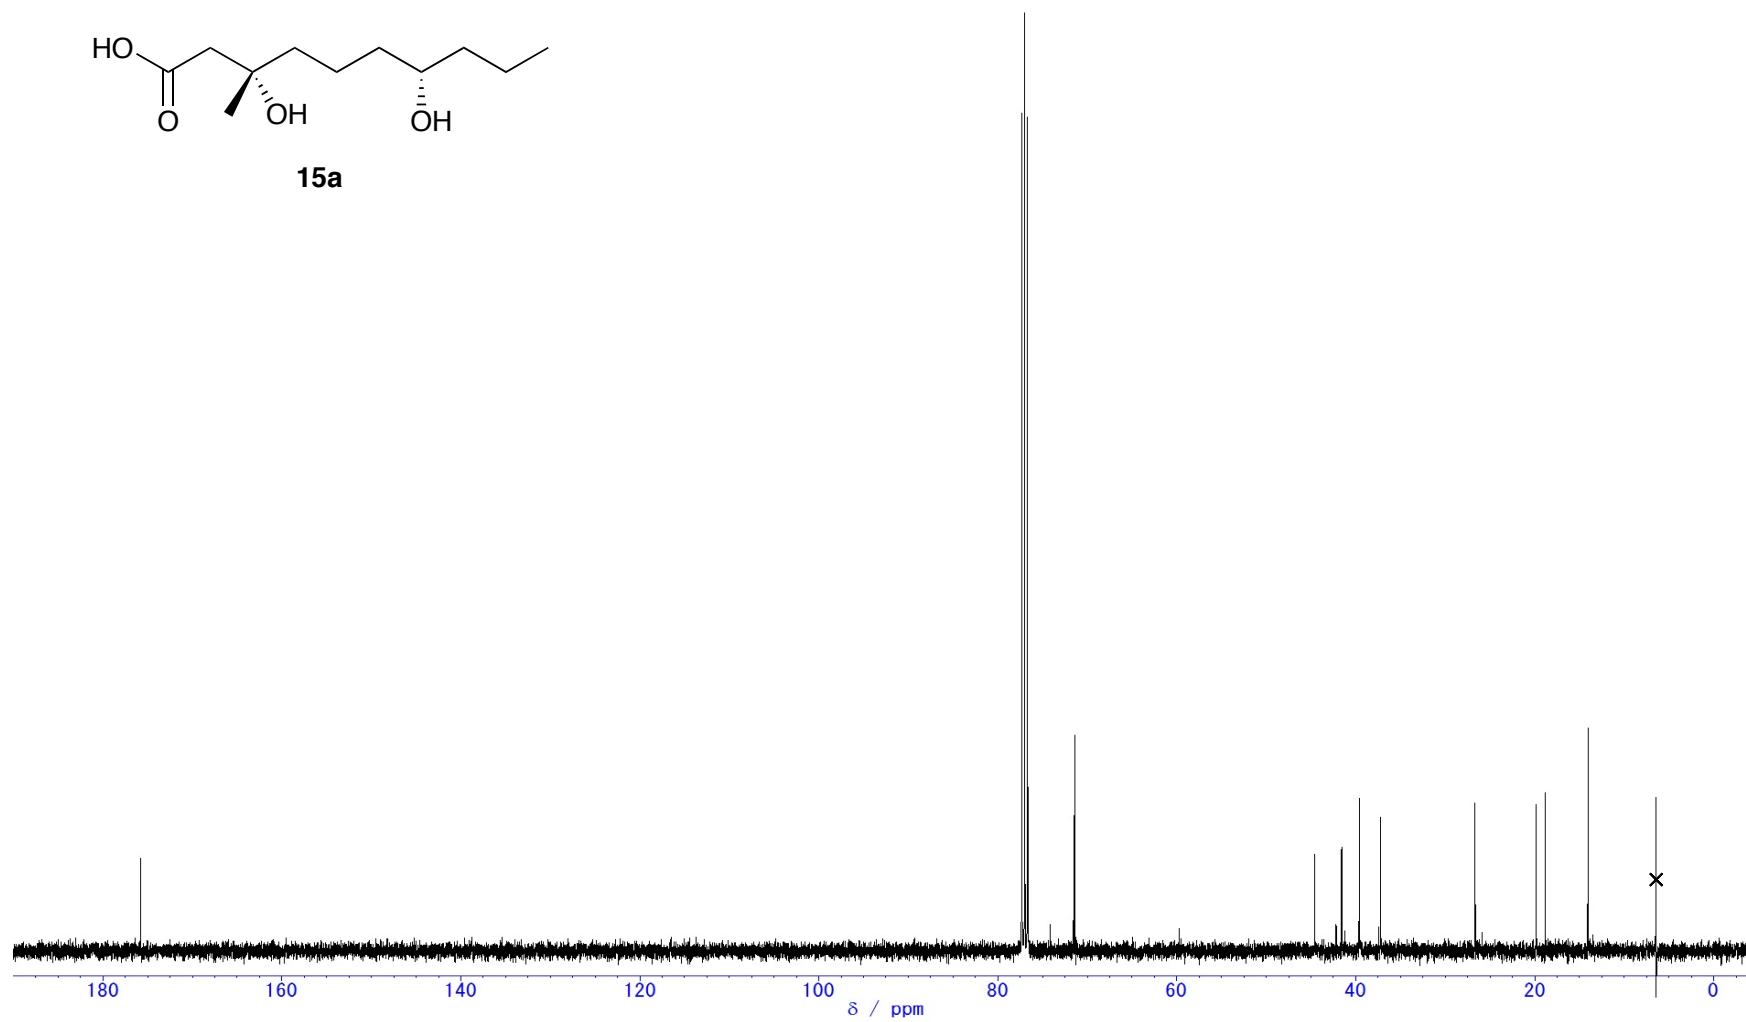

**Figure S28.**  $^1\text{H}$  NMR spectrum of **15b** in  $\text{CDCl}_3$  (400 MHz).

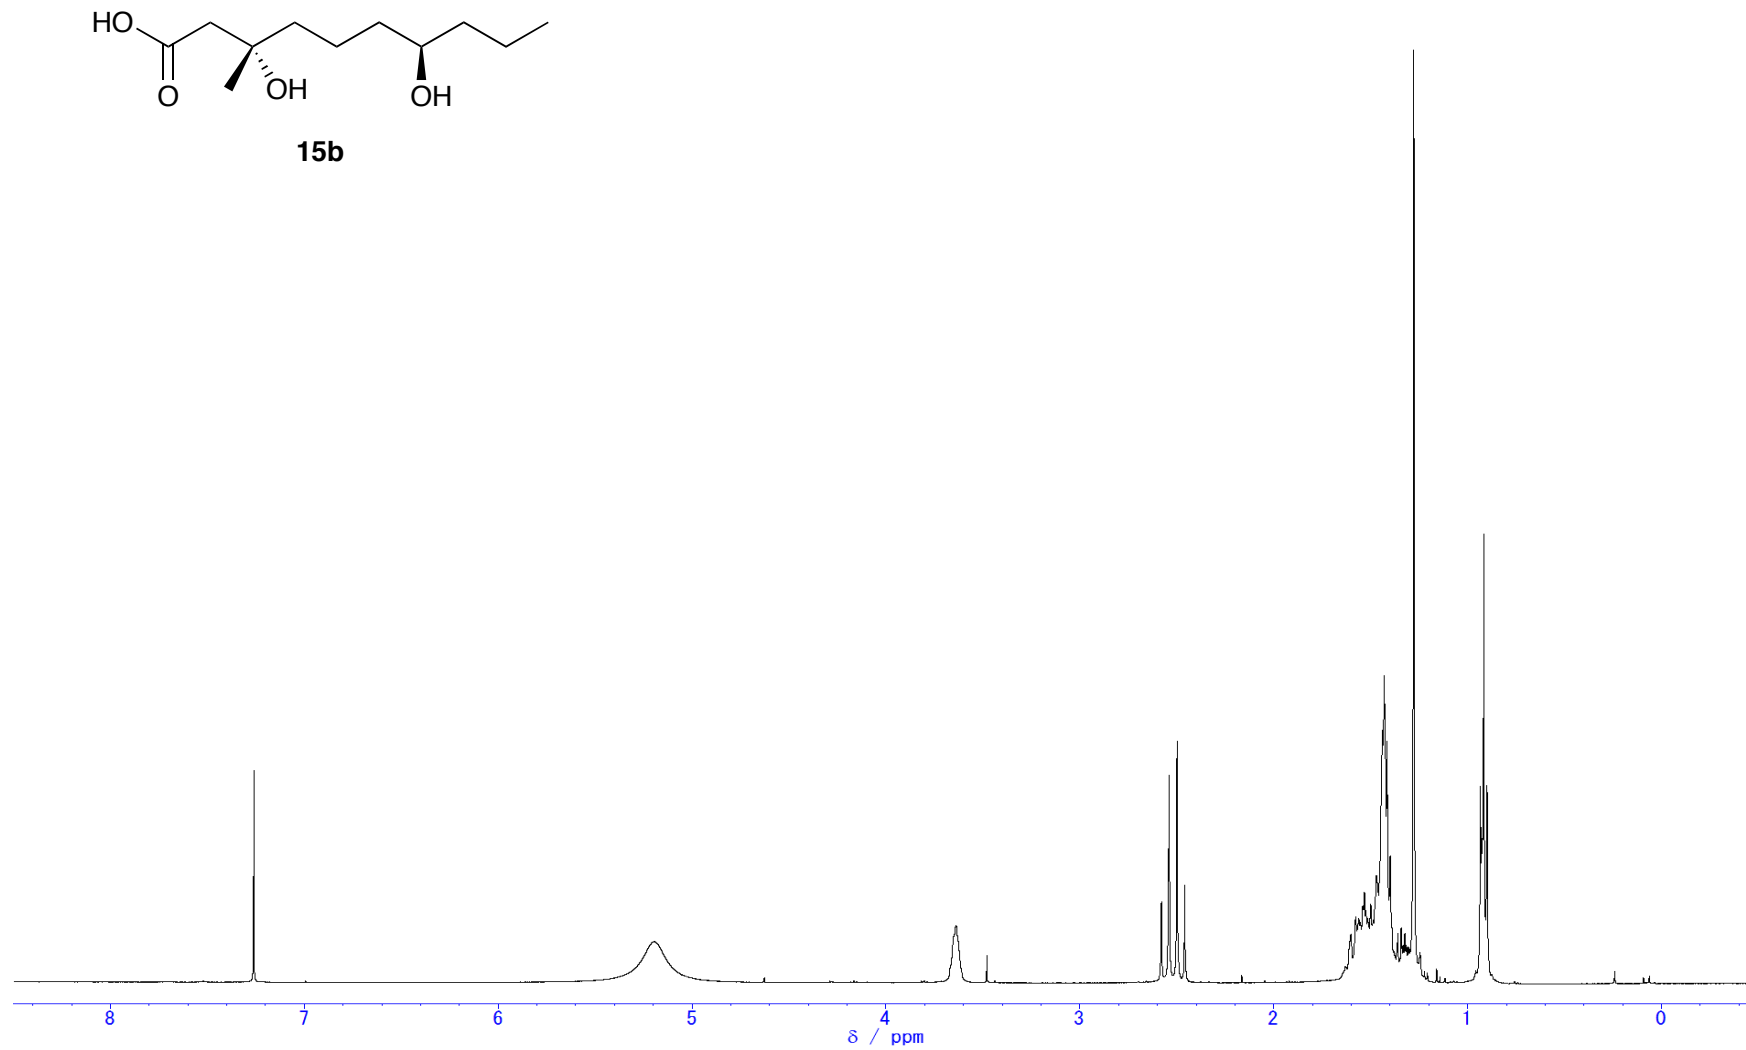

**Figure S29.**  $^{13}\text{C}$  NMR spectrum of **15b** in  $\text{CDCl}_3$  (100 MHz).

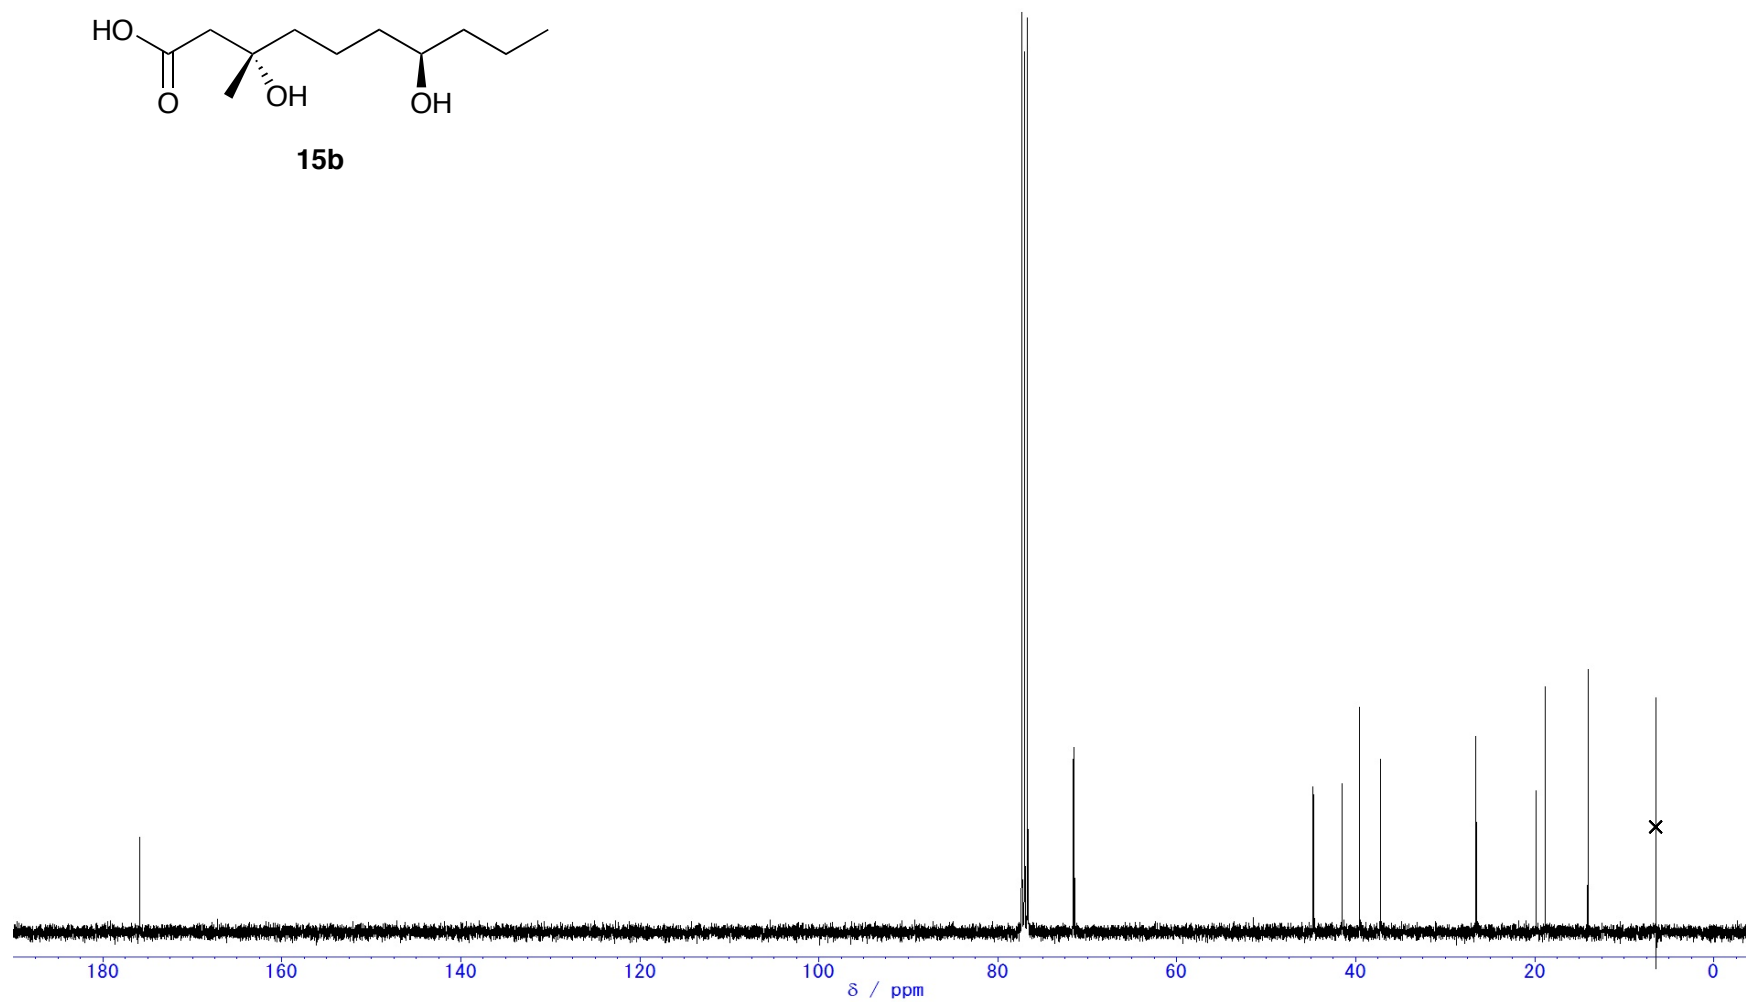

**Figure S30.**  $^1\text{H}$  NMR spectrum of **6a** in  $\text{CD}_3\text{OD}$  (600 MHz).

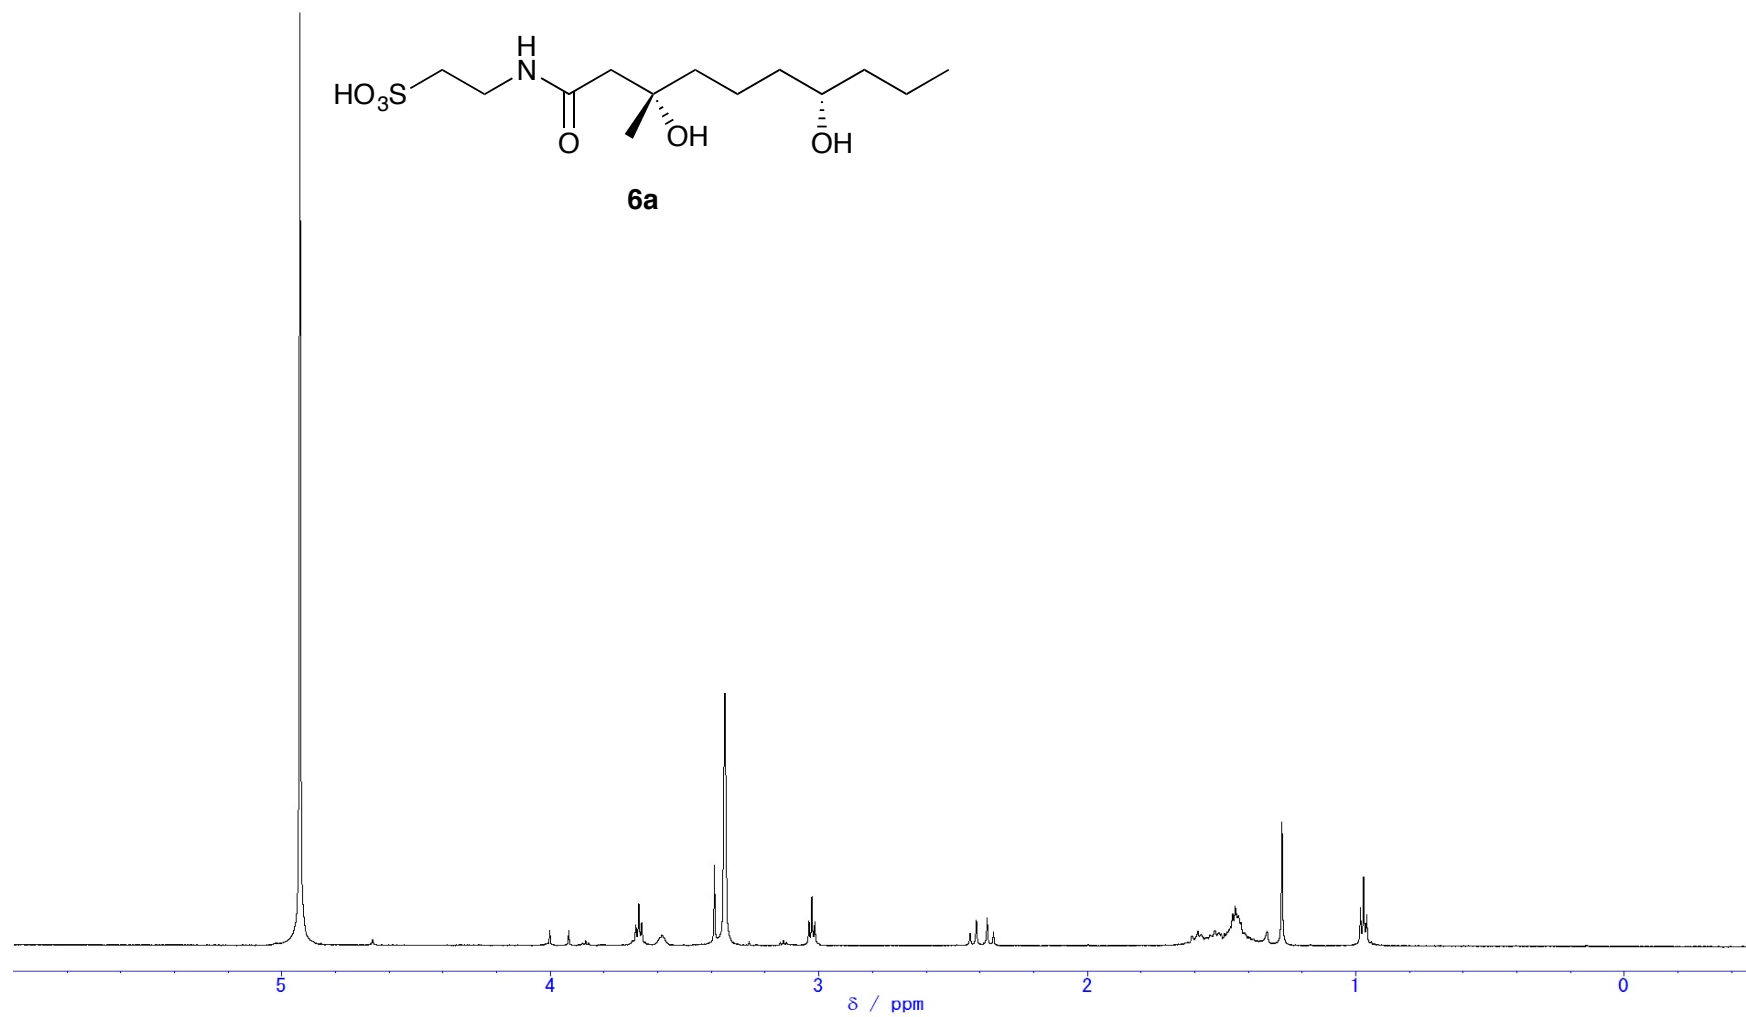



**Figure S31.**  $^{13}\text{C}$  NMR spectrum of **6a** in  $\text{CD}_3\text{OD}$  (100 MHz).

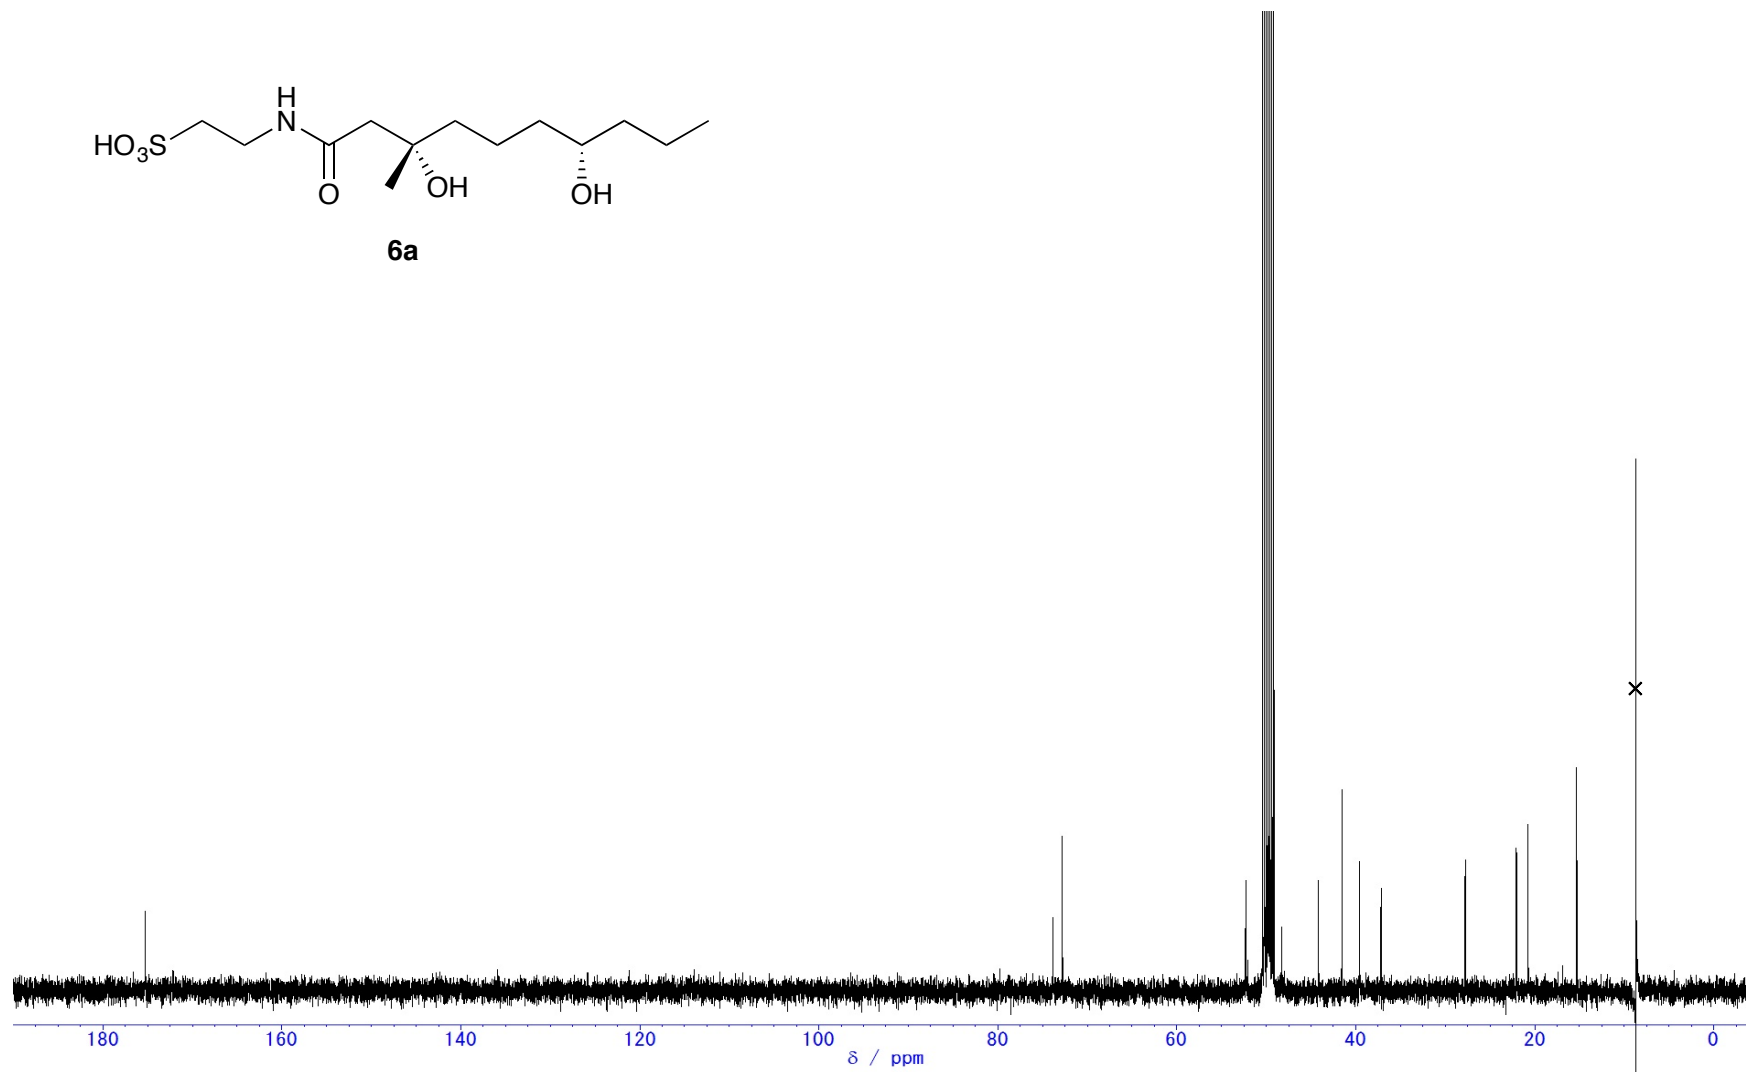

**Figure S32.**  $^1\text{H}$  NMR spectrum of **6b** in  $\text{CD}_3\text{OD}$  (600 MHz).

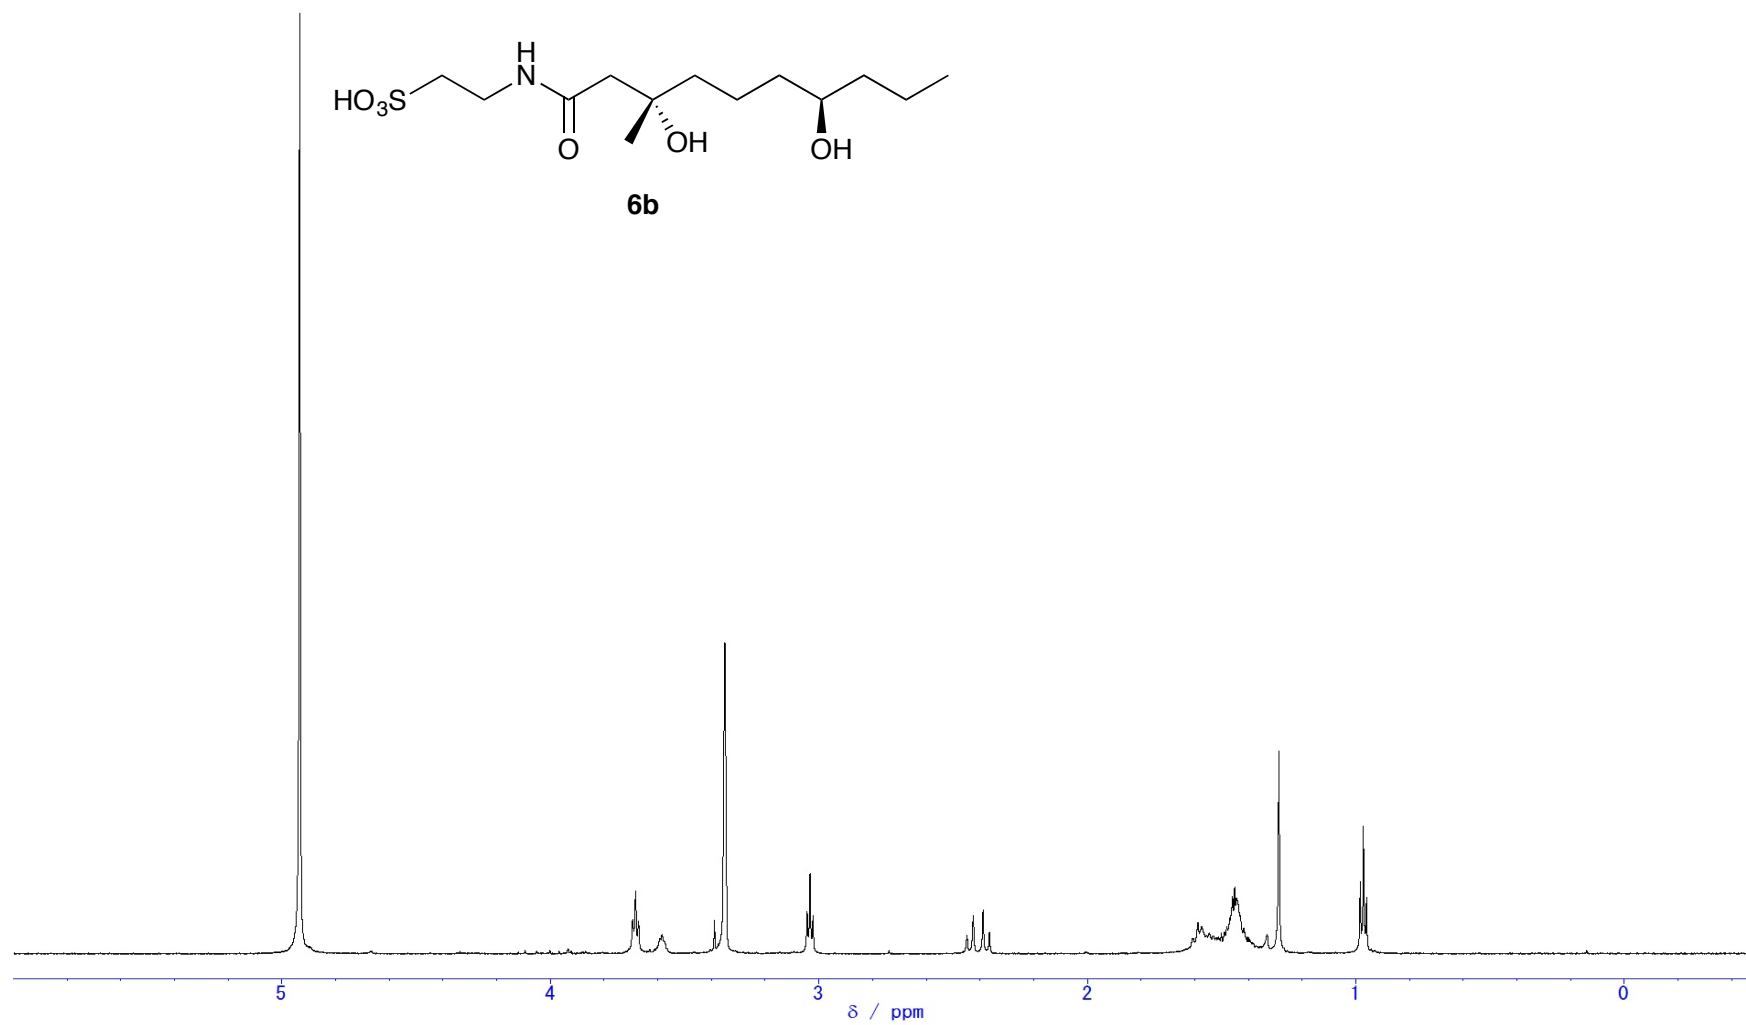

**Figure S33.**  $^{13}\text{C}$  NMR spectrum of **6b** in  $\text{CD}_3\text{OD}$  (100 MHz).

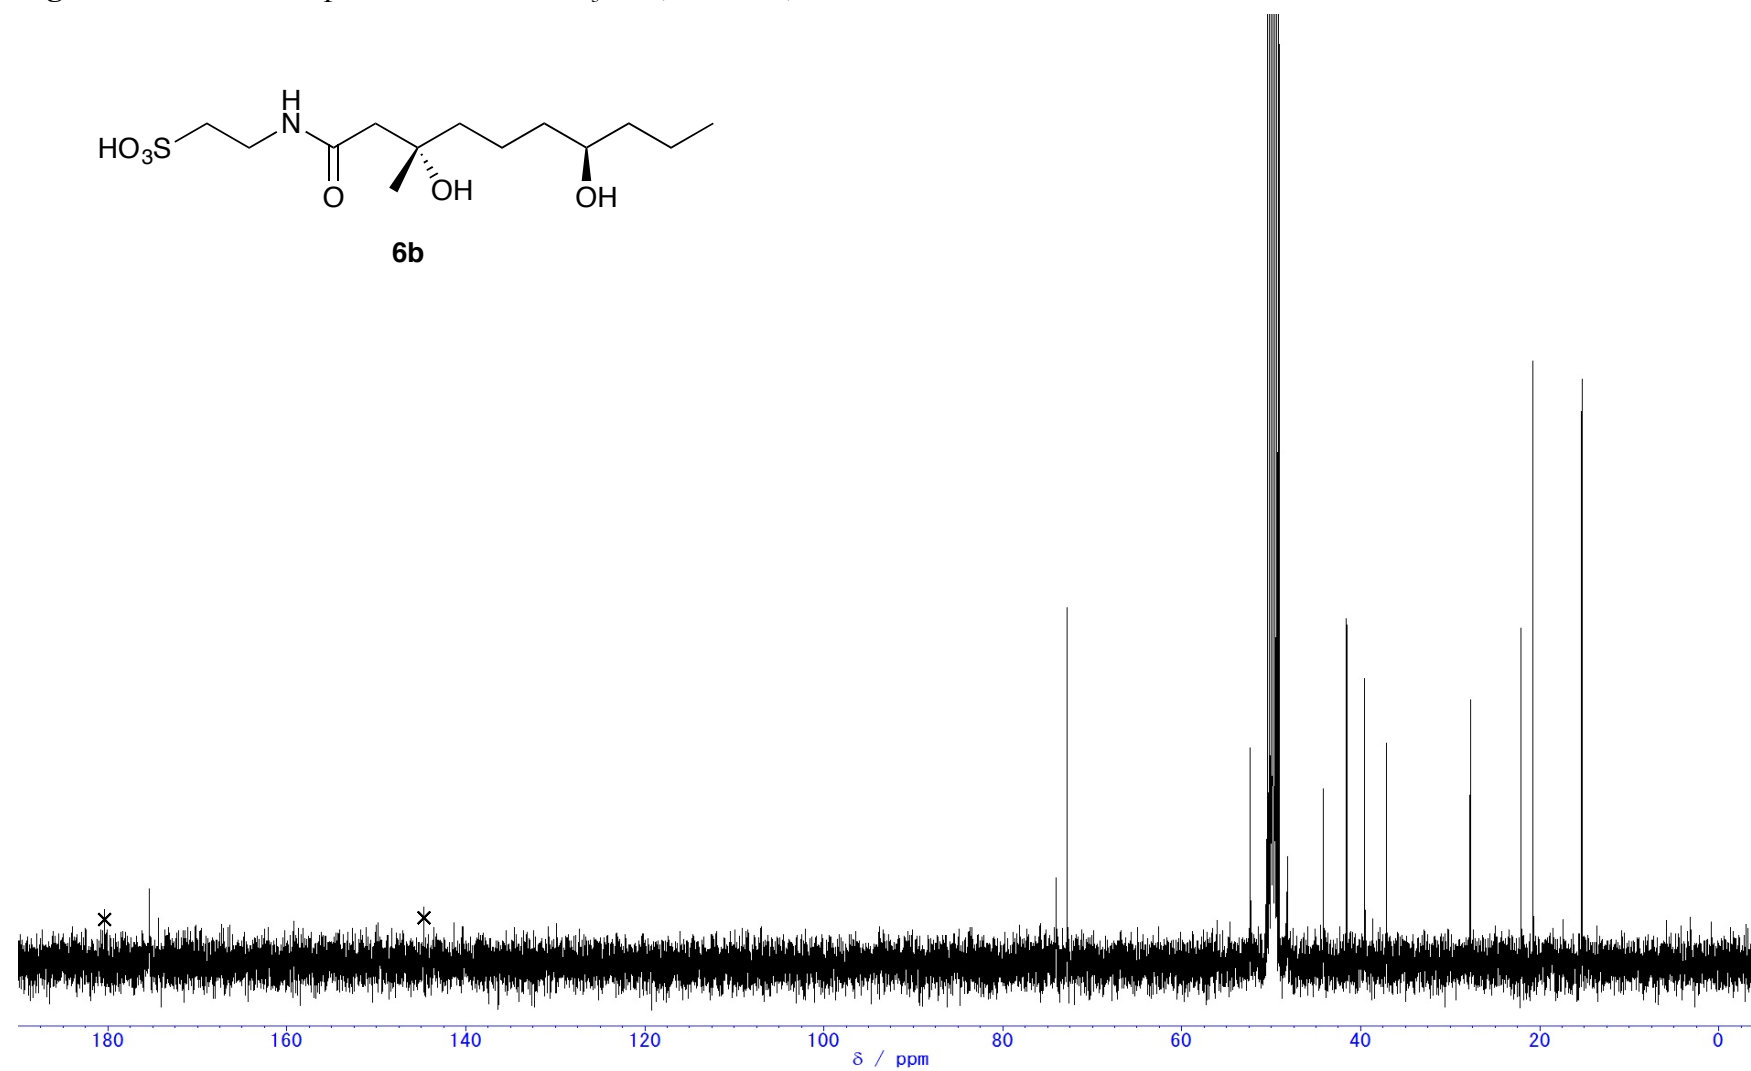

**Figure S34.**  $^1\text{H}$  NMR spectra of **4**, **6a**, and **6b** in  $\text{CD}_3\text{OD}$  (600 MHz).

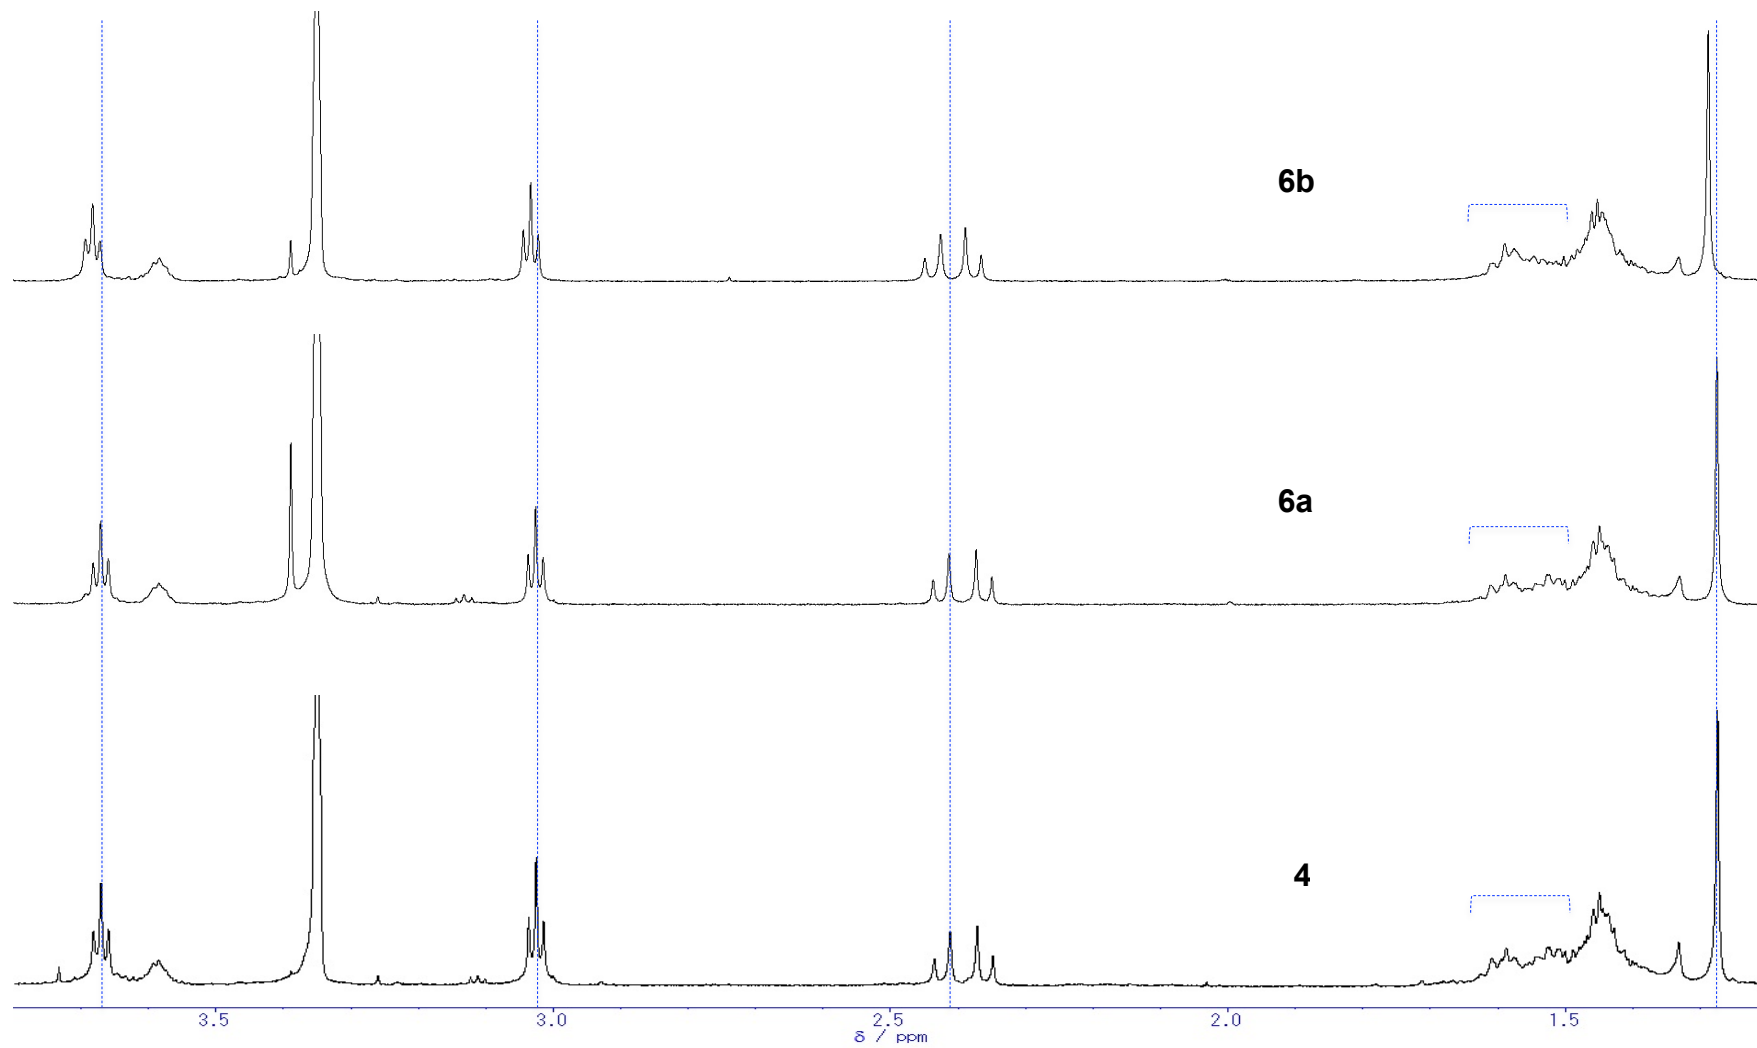

Supplement: c3ra47796g1.pdf [file c3ra47796g1.pdf]
